# Supplementary material for: Pyrazine derivative synthesis in a continuous-flow system: a green synthesis of pyrazinamide from pyrazine esters and amines catalyzed by Lipozyme® TL IM from Thermomyces lanuginosus
Source: Royal Society of Chemistry journal article supplement (doi:10.1039/d4ra06761d), 2024-01-01
Supplement: d4ra06761d1.pdf [file d4ra06761d1.pdf]

## Supporting Information for

# Pyrazine derivatives Synthesis in Continuous-flow system: A Green Synthesis of Pyrazinamide from Pyrazine esters and Amines Catalyzed by Lipozyme® TL IM from *Thermomyces lanuginosus*

Ao-Ying Zhang, <sup>#a</sup> Zong-Hao Huang, <sup>#a</sup> Li-Hua Du, <sup>\*a</sup> Hang Lin, <sup>a</sup> Han-Jia Xie, <sup>a</sup> Bing-Lin Yan, <sup>a</sup> Miao Miao Xue, <sup>a</sup> Lin Wang, <sup>a</sup> Wen-Xuan Shao, <sup>a</sup> Guo-Neng Fu <sup>a</sup> and Xi-Ping Luo <sup>\*b</sup>

<sup>a</sup> College of Pharmaceutical Science, Zhejiang University of Technology, Hangzhou, 310014, China.

<sup>b</sup> Zhejiang Provincial Key Laboratory of Chemical Utilization of Forestry Biomass, Zhejiang A&F University, Hangzhou, 311300, China.

\*Corresponding author. Fax: +86 18969069399. E-mail: orgdlh@zjut.edu.cn; orgdlh@gmail.com; luoxiping@zafu.edu.cn

# These authors contributed equally to this work and should be considered co-first authors.

### Materials

All chemicals in this study were obtained from commercial sources and did not require further purification. Lipozyme® TL IM (immobilized *Thermomyces lanuginosus*) was purchased from Novo Nordisk (Copenhagen, Denmark). Pyrazine-2-carboxylate, methyl 3-methylpyrazine-2-carboxylate, methyl 5-methylpyrazine-2-carboxylate and methylamine were purchased from Aladdin (Shanghai, China). Ethylamine, isobutylamine, benzylamine, 4-methoxybenzylamine and 4-fluorobenzylamine were purchased from Energy Chemical (Shanghai, China). N-aminomorpholine, N-(2-aminoethyl)morpholine, N-(3-aminopropyl)morpholine were purchased from Macklin (Shanghai, China). Harvard Instrument PHD 2000 syringe pump was purchased from Harvard University (Holliston, Massachusetts, USA). The flow reactor and Y-mixer were purchased from Beijing Haigui Medical Engineering Design Co., Ltd (Beijing China).

### Purification of the product

When the conversion of the pyrazinamide derivative reaches a maximum (determined by TLC), the reaction is terminated by filtering the enzyme, and the *tert*-amyl alcohol solvent is rotary evaporated under reduced pressure. The product is separated by silica gel chromatography (mobile phase petroleum ether / ethyl acetate, 6/1 to 1/1). Purification

was monitored by TLC. The graded fractions containing the major product were combined, the solvent evaporated and the residue analyzed by  $^1\text{H}$  NMR,  $^{13}\text{C}$  NMR.

### Experimental setup

A continuous-flow microreactor equipment diagram which was used for synthesis of pyrazinamide derivatives from pyrazine esters and amines catalyzed by Lipozyme® TL IM is described in Figure S1. The experimental setup consists of a syringe pump, two substrate injectors, Y-shaped mixers ( $\phi = 1.8$  mm) and a product collector. Syringe pumps (Harvard apparatus PHD 2000) were used to introduce separate feed streams to the flow reactor with  $100\text{cm} \times 2$  mm PFA tubing. Silica gel tubes were filled with Lipozyme® TL IM and immersed in a constant temperature water bath to control the temperature. A total of 5 mmol of pyrazine esters were dissolved in 10 mL of *tert*-amyl alcohol (feed 1), and 15 mmol of amines were dissolved in 10 mL of *tert*-amyl alcohol (feed 2). Feeds 1 and 2 were placed in separate 10 mL feeders and mixed at a flow rate of  $31.2 \mu\text{L min}^{-1}$  in a Y-mixer at  $45^\circ\text{C}$ . The resulting stream ( $31.2 \mu\text{L min}^{-1}$ ) was connected to a sample vial for collection of the final mixture.

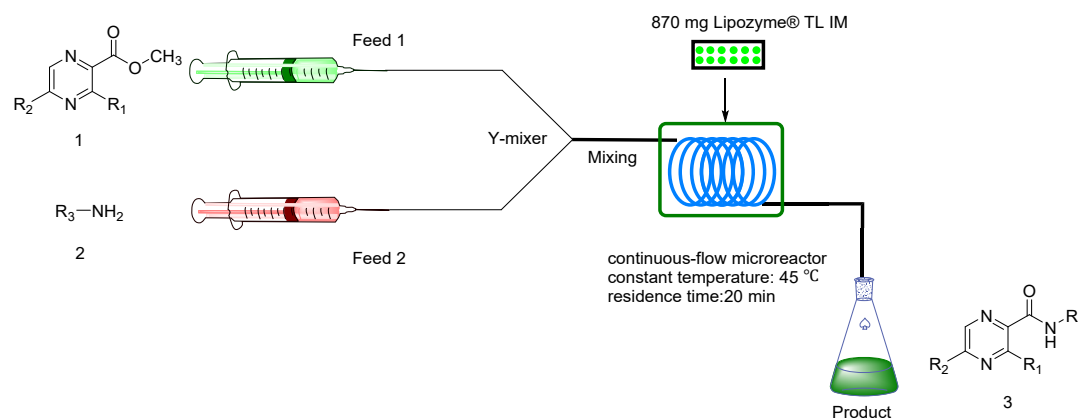

Figure S1. The equipment diagram for the synthesis of pyrazinamide derivatives in the continuous-flow microreactor catalyzed by Lipozyme® TL IM.

### General Procedure for the synthesis of pyrazinamide derivatives from pyrazine esters and amines catalyzed by Lipozyme® TL IM in Continuous-Flow Microreactors

**Method A:** 5.0 mmol of pyrazine esters was dissolved in 10 mL *tert*-amyl alcohol (feed A,  $\sim 0.5$  M) and 15.0 mmol amine were dissolved in 10 mL *tert*-amyl alcohol (feed B;  $\sim 1.0$  M). Lipozyme® TL IM (0.87 g) were filled in PFA reactor coil (inner

diameter ID= 2.0 mm, length = 100cm.). Streams A and B were mixed together at a flow rate of 15.6  $\mu\text{L min}^{-1}$  in a Y-mixer at 45 °C and the resulting stream (31.2  $\mu\text{L min}^{-1}$ ) was connected to a sample vial which was used to collect the final mixture. The final mixture was then evaporated, and the residue was submitted to column chromatography on silica gel (200-300 mesh). The crude product was purified by silica gel column chromatography with a petroleum ether / ethyl acetate gradient from 6:1 to 1:1. The purification was monitored by TLC. The fractions containing the main products were pooled, the solvent evaporated, and the residue analyzed by  $^1\text{H}$  NMR, and  $^{13}\text{C}$  NMR.

### **General Procedure for the synthesis of pyrazinamide derivatives from pyrazine esters and amines catalyzed by Lipozyme® TL IM under Shaker Conditions**

**Method B:** pyrazine esters (5.0 mmol) and amine (15.0 mmol) were added to 20 mL *tert*-amyl alcohol. The biocatalyst Lipozyme® TL IM (0.87 g) was then added and the suspension maintained at 45 °C for 17 h under Shaker Conditions (200  $\text{r}\cdot\text{min}^{-1}$ ). The mixture was cooled and filtered. Then evaporated under reduced pressure and the residue was submitted to column chromatography on silica gel (200-300 mesh). The crude product was purified by silica gel column chromatography with a petroleum ether /ethyl acetate gradient from 6:1 to 1:1. The purification was monitored by TLC. The fractions containing the main products were pooled, the solvent evaporated, and the residue analyzed by  $^1\text{H}$  NMR, and  $^{13}\text{C}$  NMR.

### **Experimental data of products**

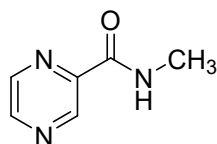

*N*-methylpyrazine-2-carboxamide (3a). White powder, 86.4% yield, **m.p. 105°C**.<sup>1</sup>  $^1\text{H}$  NMR (400 MHz, Chloroform-*d*)  $\delta$  9.38 (d,  $J$  = 1.4 Hz, 1H), 8.72 (d,  $J$  = 2.5 Hz, 1H), 8.49 (dd,  $J$  = 2.3, 1.6 Hz, 1H), 7.82 (br s, 1H, -NH), 3.03 (d,  $J$  = 5.1 Hz, 3H).  $^{13}\text{C}$  NMR (101 MHz, Chloroform-*d*)  $\delta$  163.60, 147.21, 144.50, 144.28, 142.55, 26.15.

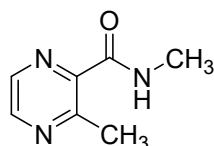

*N*,3-dimethylpyrazine-2-carboxamide (3b). White powder, 72.6% yield, **m.p. 88°C**.  $^1\text{H}$  NMR (400 MHz, Chloroform-*d*)  $\delta$  8.55 (d,  $J = 2.4$  Hz, 1H), 8.31 (d,  $J = 2.4$  Hz, 1H), 7.90 (br s, 1H, -NH), 3.00 – 2.93 (m, 6H).  $^{13}\text{C}$  NMR (101 MHz, Chloroform-*d*)  $\delta$  165.19, 155.28, 145.71, 142.80, 139.89, 26.10, 23.65.

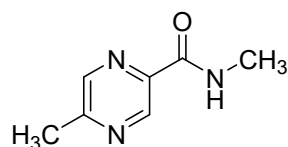

*N*,5-dimethylpyrazine-2-carboxamide (3c). White powder, 77.9% yield, **m.p. 130°C**.  $^1\text{H}$  NMR (400 MHz, Chloroform-*d*)  $\delta$  9.24 (d,  $J = 1.9$  Hz, 1H), 8.35 (d,  $J = 1.5$  Hz, 1H), 7.78 (br s, 1H, -NH), 3.02 (s, 3H), 2.62 (d,  $J = 3.8$  Hz, 3H).  $^{13}\text{C}$  NMR (101 MHz, Chloroform-*d*)  $\delta$  163.91, 156.90, 143.14, 142.29, 141.83, 26.03, 21.76.

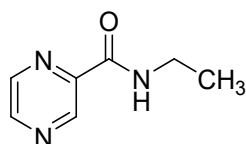

*N*-ethylpyrazine-2-carboxamide (3d). White solid, 81.2% yield, **m.p. 67°C**.<sup>2</sup>  $^1\text{H}$  NMR (400 MHz, Chloroform-*d*)  $\delta$  9.39 (d,  $J = 1.5$  Hz, 1H), 8.73 (d,  $J = 2.5$  Hz, 1H), 8.51 (dd,  $J = 2.5, 1.6$  Hz, 1H), 7.82 (br s, 1H, -NH), 3.52 (qd,  $J = 7.3, 5.8$  Hz, 2H), 1.26 (t,  $J = 7.3$  Hz, 3H).  $^{13}\text{C}$  NMR (101 MHz, Chloroform-*d*)  $\delta$  162.79, 147.14, 144.60, 144.34, 142.50, 34.34, 14.79.

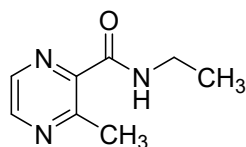

*N*-ethyl-3-methylpyrazine-2-carboxamide (3e). Yellowish oily liquid, 61.3% yield.  $^1\text{H}$  NMR (400 MHz, Chloroform-*d*)  $\delta$  8.53 (d,  $J = 2.4$  Hz, 1H), 8.30 (d,  $J = 2.4$  Hz, 1H), 7.88 (br s, 1H, -NH), 3.49 – 3.37 (m, 2H), 2.93 (s, 3H), 1.21 (t,  $J = 7.3$  Hz, 3H).  $^{13}\text{C}$  NMR (101 MHz, Chloroform-*d*)  $\delta$  164.43, 155.28, 145.64, 142.89, 139.88, 34.27, 23.64, 14.74.

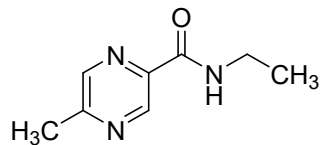

*N*-ethyl-5-methylpyrazine-2-carboxamide (3f). White crystal, 70.7% yield, **m.p. 86°C**.  $^1\text{H}$  NMR (400 MHz, Chloroform-*d*)  $\delta$  9.21 (d,  $J = 1.8$  Hz, 1H), 8.32 (d,  $J = 1.8$  Hz, 1H), 7.73 (br s, 1H, -NH), 3.53 – 3.40 (m, 2H), 2.59 (s, 3H), 1.22 (t,  $J = 4.1$  Hz, 3H).  $^{13}\text{C}$  NMR (101 MHz, Chloroform-*d*)  $\delta$  163.10, 156.84, 143.23, 142.22, 141.91, 34.22, 21.76, 14.81.

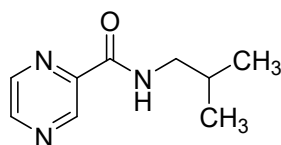

*N*-isobutylpyrazine-2-carboxamide (3g). White solid, 85.5% yield, **m.p. 61°C**. <sup>1</sup>H NMR (400 MHz, Chloroform-*d*) δ 9.41 (d, *J* = 1.5 Hz, 1H), 8.74 (d, *J* = 2.5 Hz, 1H), 8.52 (dd, *J* = 2.6, 1.5 Hz, 1H), 7.90 (br s, 1H, -NH), 3.32 (t, *J* = 6.1 Hz, 2H), 1.92 (hept, *J* = 6.7 Hz, 1H), 0.99 (d, *J* = 6.7 Hz, 6H). <sup>13</sup>C NMR (101 MHz, Chloroform-*d*) δ 162.93, 147.14, 144.61, 144.42, 142.48, 46.74, 28.67, 20.15.

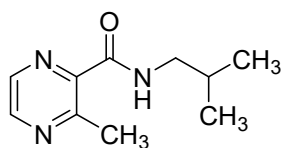

*N*-isobutyl-3-methylpyrazine-2-carboxamide (3h). Yellowish oily liquid, 61.2% yield. <sup>1</sup>H NMR (400 MHz, Chloroform-*d*) δ 8.58 (d, *J* = 2.4 Hz, 1H), 8.35 (d, *J* = 2.5 Hz, 1H), 8.01 (br s, 1H, -NH), 3.26 (t, *J* = 6.8 Hz, 2H), 2.97 (s, 3H), 1.90 (hept, *J* = 7.9 Hz, 1H), 0.97 (d, *J* = 6.8 Hz, 6H). <sup>13</sup>C NMR (101 MHz, Chloroform-*d*) δ 164.55, 155.38, 145.66, 142.93, 139.90, 46.77, 28.63, 23.69, 20.19.

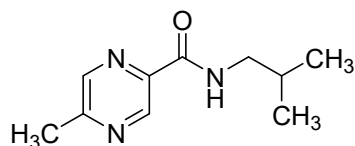

*N*-isobutyl-5-methylpyrazine-2-carboxamide (3i). White powder, 70.3% yield, **m.p. 115°C**. <sup>1</sup>H NMR (400 MHz, Chloroform-*d*) δ 9.26 (s, 1H), 8.37 (s, 1H), 7.84 (br s, 1H, -NH), 3.30 (t, *J* = 6.6 Hz, 2H), 2.64 (s, 3H), 1.91 (hept, *J* = 6.7 Hz, 1H), 0.97 (d, *J* = 1.3 Hz, 6H). <sup>13</sup>C NMR (101 MHz, Chloroform-*d*) δ 163.23, 156.85, 143.30, 142.24, 141.92, 46.66, 28.68, 21.78, 20.15.

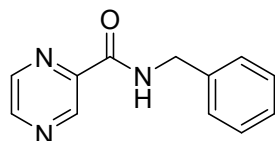

*N*-benzylpyrazine-2-carboxamide (3j). White solid, 80.3% yield, **m.p. 117°C**.<sup>3</sup> <sup>1</sup>H NMR (400 MHz, Chloroform-*d*) δ 9.47 (s, 1H), 8.76 (d, *J* = 2.7 Hz, 1H), 8.52 (d, *J* = 2.7 Hz, 1H), 8.17 (br s, 1H, -NH), 7.41 – 7.36 (m, 4H), 7.36 – 7.28 (m, 1H), 4.70 (d, *J* = 6.0 Hz, 2H). <sup>13</sup>C NMR (101 MHz, Chloroform-*d*) δ 162.92, 147.35, 144.55, 144.43, 142.56, 137.76, 128.82, 127.90, 127.71, 43.52.

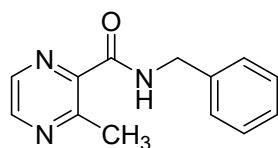

*N*-benzyl-3-methylpyrazine-2-carboxamide (3k). Yellowish oily liquid, 61.2% yield, **m.p. 78°C**. <sup>1</sup>H NMR (400 MHz, Chloroform-*d*) δ 8.58 (d, *J* = 2.4 Hz, 1H), 8.33 (d, *J* = 2.4 Hz, 1H), 8.27 (br s, 1H, -NH), 7.39 – 7.30 (m, 4H), 7.34 – 7.24 (m, 1H), 4.63 (d, *J* = 6.0 Hz, 2H), 3.02 (s, 3H). <sup>13</sup>C NMR (101 MHz, Chloroform-*d*) δ 164.44, 155.58, 145.88, 142.65, 139.95, 138.10, 128.77, 127.84, 127.57, 43.49, 23.75.

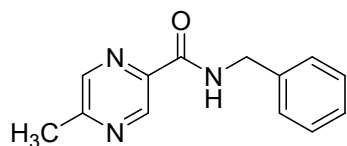

*N*-benzyl-5-methylpyrazine-2-carboxamide (3l). White powder, 73.3% yield, **m.p. 108°C**. <sup>1</sup>H NMR (400 MHz, Chloroform-*d*) δ 9.30 (s, 1H), 8.34 (s, 1H), 8.09 (br s, 1H, -NH), 7.37 –

7.31 (m, 4H), 7.33 – 7.25 (m, 1H), 4.66 (d,  $J = 6.0$  Hz, 2H), 2.63 (s, 3H).  $^{13}\text{C}$  NMR (101 MHz, Chloroform- $d$ )  $\delta$  163.24, 157.13, 143.46, 142.32, 141.74, 137.92, 128.78, 127.88, 127.63, 43.43, 21.85.

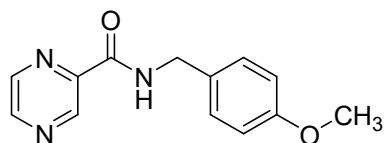

*N*-(4-methoxybenzyl)pyrazine-2-carboxamide (3m). White solid, 83.5% yield, **m.p. 134°C**.  $^1\text{H}$  NMR (400 MHz, Chloroform- $d$ )  $\delta$  9.44 (s, 1H), 8.74 (d,  $J = 2.4$  Hz, 1H), 8.49 (d,  $J = 2.7$  Hz, 1H), 8.10 (br s, 1H, -NH), 7.31 (d,  $J = 8.3$  Hz, 1H), 6.89 (d,  $J = 8.5$  Hz, 1H), 4.62 (d,  $J = 5.9$  Hz, 2H), 3.80 (s, 3H).  $^{13}\text{C}$  NMR (101 MHz, Chloroform- $d$ )  $\delta$  162.80, 159.16, 147.27, 144.50, 142.56, 129.84, 129.29, 114.16, 55.32, 43.01.

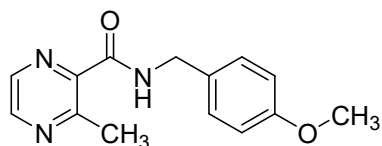

*N*-(4-methoxybenzyl)-3-methylpyrazine-2-carboxamide (3n). White powder, 66.5% yield, **m.p. 93°C**.  $^1\text{H}$  NMR (400 MHz, Chloroform- $d$ )  $\delta$  8.57 (d,  $J = 2.4$  Hz, 1H), 8.32 (d,  $J = 2.4$  Hz, 1H), 8.19 (br s, 1H, -NH), 7.32 – 7.25 (d,  $J = 8.6$  Hz, 2H), 6.87 (d,  $J = 8.7$  Hz, 2H), 4.56 (d,  $J = 5.9$  Hz, 2H), 3.79 (s, 3H), 3.01 (s, 3H).  $^{13}\text{C}$  NMR (101 MHz, Chloroform- $d$ )  $\delta$  164.33, 159.09, 155.51, 145.78, 142.73, 139.94, 130.17, 129.22, 114.14, 55.31, 42.98, 23.72.

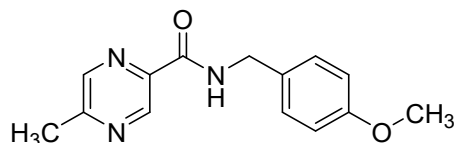

*N*-(4-methoxybenzyl)-5-methylpyrazine-2-carboxamide (3o). White powder, 73.5% yield, **m.p. 117°C**.  $^1\text{H}$  NMR (400 MHz, Chloroform- $d$ )  $\delta$  9.28 (s, 1H), 8.33 (s, 1H), 8.00 (br s, 1H, -NH), 7.28 (d,  $J = 8.4$  Hz, 2H), 6.86 (d,  $J = 8.3$  Hz, 2H), 4.58 (d,  $J = 5.9$  Hz, 2H), 3.78 (s, 3H), 2.63 (s, 3H).  $^{13}\text{C}$  NMR (101 MHz, Chloroform- $d$ )  $\delta$  163.11, 159.12, 157.05, 143.41, 142.31, 141.81, 129.99, 129.29, 114.14, 55.31, 42.93, 21.82.

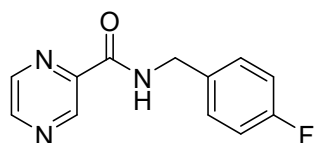

*N*-(4-fluorobenzyl)pyrazine-2-carboxamide (3p). White solid, 67.7% yield, **m.p. 134°C**.<sup>4</sup>  $^1\text{H}$  NMR (400 MHz, Chloroform- $d$ )  $\delta$  9.42 (d,  $J = 1.6$  Hz, 1H), 8.73 (d,  $J = 2.4$  Hz, 1H), 8.49 (dd,  $J = 2.0, 1.1$  Hz, 1H), 8.14 (br s, 1H, -NH), 7.32 (dd,  $J = 8.4, 5.4$  Hz, 2H), 7.01 (t,  $J = 8.6$  Hz, 2H), 4.63 (d,  $J = 6.1$  Hz, 2H).  $^{13}\text{C}$  NMR (101 MHz, Chloroform- $d$ )  $\delta$  163.50, 162.94 (d, 1 Jc-f = 243.67 Hz), 147.40, 144.53, 144.33, 142.57, 133.64 (d, 4 Jc-f = 3.40 Hz), 129.62 (d, 3 Jc-f = 8.20 Hz), 115.75 (d, 2 Jc-f = 21.42 Hz), 42.77.  $^{19}\text{F}$  NMR (377 MHz, Chloroform- $d$ )  $\delta$  -114.51 – -114.70 (m).

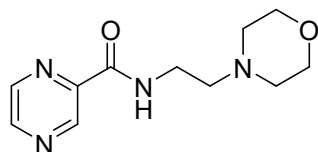

*N*-(2-morpholinoethyl)pyrazine-2-carboxamide (3q). White crystal, 80.6% yield, **m.p.** 91°C. <sup>1</sup>H NMR (400 MHz, Chloroform-*d*) δ 9.39 (d, *J* = 1.5 Hz, 1H), 8.74 (d, *J* = 2.4 Hz, 1H), 8.55 (dd, *J* = 2.5, 1.5 Hz, 1H), 8.19 (br s, 1H, -NH), 3.74 (t, *J* = 4.0 Hz, 4H), 3.60 (q, *J* = 5.9 Hz, 2H), 2.62 (t, *J* = 6.1 Hz, 2H), 2.52 (t, *J* = 4.7 Hz, 4H). <sup>13</sup>C NMR (101 MHz, Chloroform-*d*) δ 163.05, 147.18, 144.62, 144.38, 142.66, 66.95, 57.05, 53.42, 35.84.

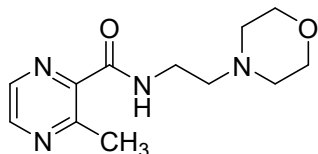

3-methyl-*N*-(2-morpholinoethyl)pyrazine-2-carboxamide (3r). Yellow oily liquid, 70.9% yield. <sup>1</sup>H NMR (400 MHz, Chloroform-*d*) δ 8.52 (d, *J* = 7.4 Hz, 1H), 8.31 (d, *J* = 10.9 Hz, 1H), 8.17 (br s, 1H, -NH), 3.66 (t, *J* = 4.1 Hz, 4H), 3.48 (q, *J* = 5.6 Hz, 2H), 2.90 (s, 3H), 2.53 (t, *J* = 4.1 Hz, 2H), 2.44 (t, *J* = 6.0 Hz, 4H). <sup>13</sup>C NMR (101 MHz, Chloroform-*d*) δ 164.66, 155.17, 145.63, 142.96, 140.04, 66.87, 57.13, 53.38, 35.86, 23.59.

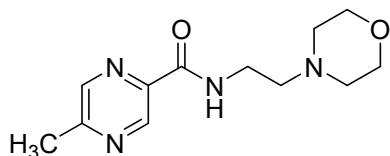

5-methyl-*N*-(2-morpholinoethyl)pyrazine-2-carboxamide (3s). Yellow crystal, 71.3% yield, **m.p.** 80°C. <sup>1</sup>H NMR (400 MHz, Chloroform-*d*) δ 9.22 (s, 1H), 8.37 (s, 1H), 8.08 (br s, 1H, -NH), 3.70 (t, *J* = 4.5 Hz, 4H), 3.55 (q, *J* = 6.0 Hz, 2H), 2.61 (s, 3H), 2.58 (t, *J* = 4.1 Hz, 2H), 2.48 (t, *J* = 6.0 Hz, 4H). <sup>13</sup>C NMR (101 MHz, Chloroform-*d*) δ 163.35, 156.89, 143.28, 142.40, 141.93, 66.97, 57.11, 53.42, 35.80, 21.81.

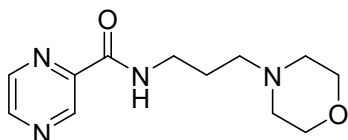

*N*-(3-morpholinopropyl)pyrazine-2-carboxamide (3t). Yellowish oily liquid, 91.6% yield. <sup>1</sup>H NMR (400 MHz, Chloroform-*d*) δ 9.39 (d, *J* = 1.5 Hz, 1H), 9.06 (br s, 1H, -NH), 8.73 (d, *J* = 2.4 Hz, 1H), 8.54 (dd, *J* = 7.7, 4.0 Hz, 1H), 3.79 (t, *J* = 4.7 Hz, 4H), 3.59 (q, *J* = 5.9 Hz, 2H), 2.51 (dt, *J* = 15.9, 5.4 Hz, 6H), 1.80 (p, *J* = 6.2 Hz, 2H). <sup>13</sup>C NMR (101 MHz, Chloroform-*d*) δ 163.06, 147.08, 144.86, 144.44, 142.52, 66.84, 58.14, 53.83, 39.59, 24.84.

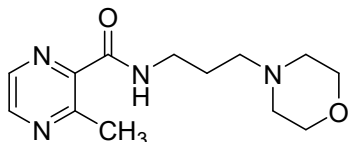

3-methyl-*N*-(3-morpholinopropyl)pyrazine-2-carboxamide (3u). Yellow oily liquid, 70.3% yield. <sup>1</sup>H NMR (400 MHz, Chloroform-*d*) δ 8.91 (br s, 1H, -NH), 8.56 (d, *J* = 2.4 Hz, 1H), 8.35 (d, *J* = 2.4 Hz, 1H), 3.73 (t, *J* = 4.0 Hz, 4H), 3.51 (q, *J* = 6.0 Hz, 2H), 2.95 (s, 3H), 2.49 (t, *J* = 4.1 Hz, 4H), 2.45 (t, *J* = 4.2 Hz, 2H), 1.77 (p, *J* = 6.3 Hz, 2H). <sup>13</sup>C NMR (101 MHz, Chloroform-*d*) δ 164.68, 155.27, 145.58, 143.21, 139.90, 66.85, 57.96, 53.78, 39.30, 25.07, 23.67.

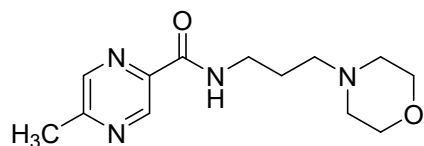

*5-methyl-N-(3-morpholinopropyl)pyrazine-2-carboxamide* (3v). Yellow crystal, 80.5% yield, **m.p. 87°C**. <sup>1</sup>H NMR (400 MHz, Chloroform-*d*) δ 9.24 (s, 1H), 8.98 (br s, 1H, -NH), 8.39 (s, 1H), 3.78 (t, *J* = 4.7 Hz, 4H), 3.57 (q, *J* = 5.8 Hz, 2H), 2.63 (s, 3H), 2.51 (dt, *J* = 16.0, 5.6 Hz, 6H), 1.78 (p, *J* = 6.3 Hz, 2H). <sup>13</sup>C NMR (101 MHz, Chloroform-*d*) δ 163.33, 156.77, 143.34, 142.24, 142.17, 66.84, 58.17, 53.83, 39.48, 24.91, 21.76.

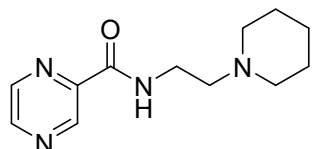

*N-(2-(piperidin-1-yl)ethyl)pyrazine-2-carboxamide* (3w). White crystal, 85.8% yield, **m.p. 88°C**. <sup>1</sup>H NMR (400 MHz, Chloroform-*d*) δ 9.39 (d, *J* = 1.5 Hz, 1H), 8.73 (d, *J* = 2.5 Hz, 1H), 8.55 (dd, *J* = 7.6, 2.0 Hz, 1H), 8.23 (br s, 1H, -NH), 3.58 (q, *J* = 6.0 Hz, 2H), 2.57 (t, *J* = 6.3 Hz, 2H), 2.45 (t, *J* = 5.2 Hz, 4H), 1.60 (p, *J* = 5.6 Hz, 4H), 1.50 – 1.40 (m, 2H). <sup>13</sup>C NMR (101 MHz, Chloroform-*d*) δ 163.01, 147.04, 144.80, 144.37, 142.66, 57.22, 54.40, 36.31, 25.97, 24.35.



3a

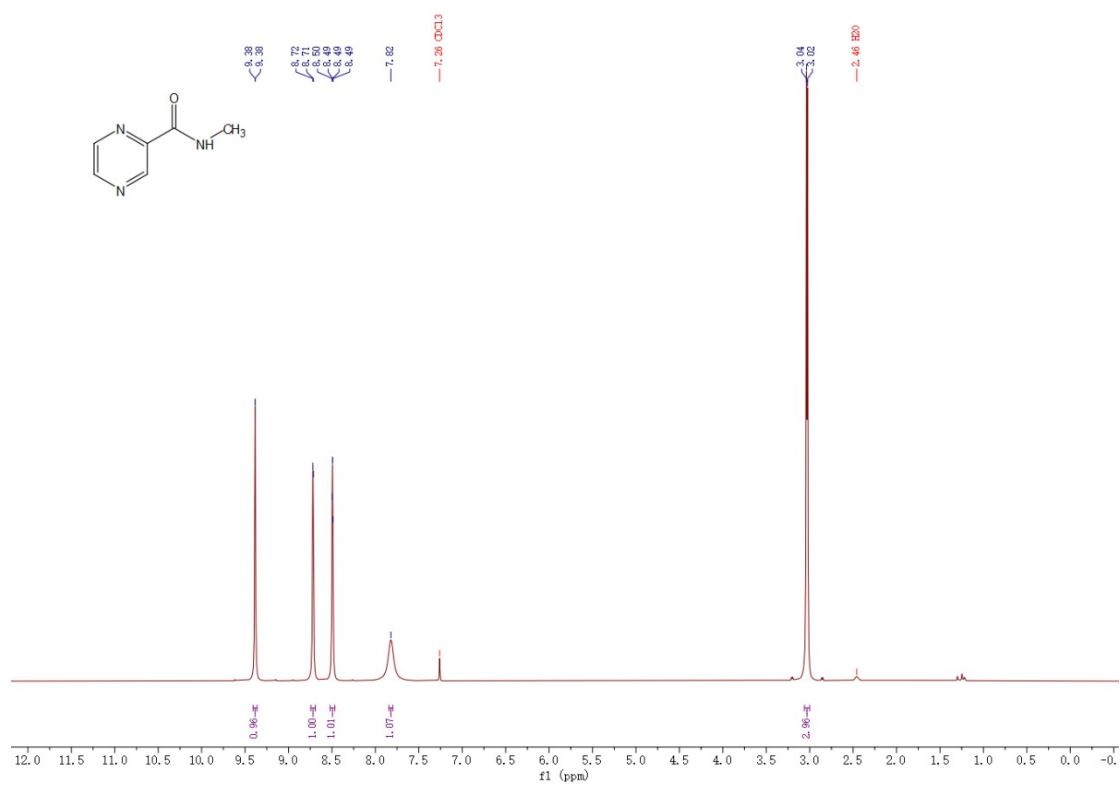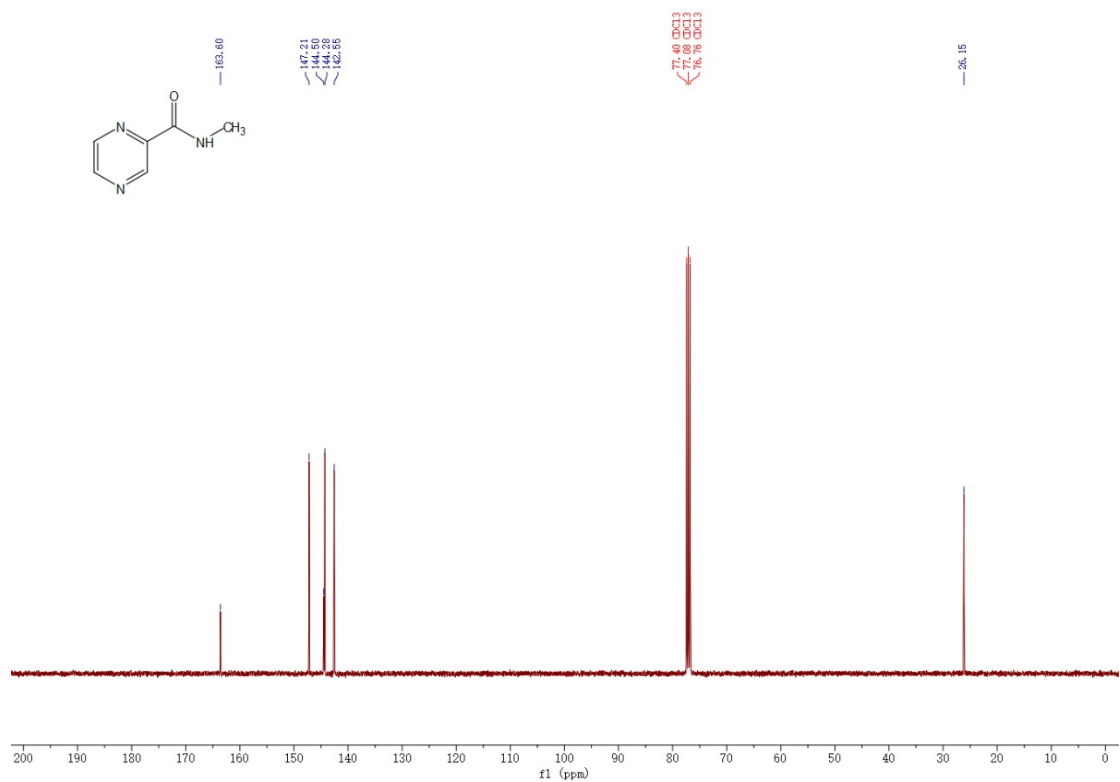

3b

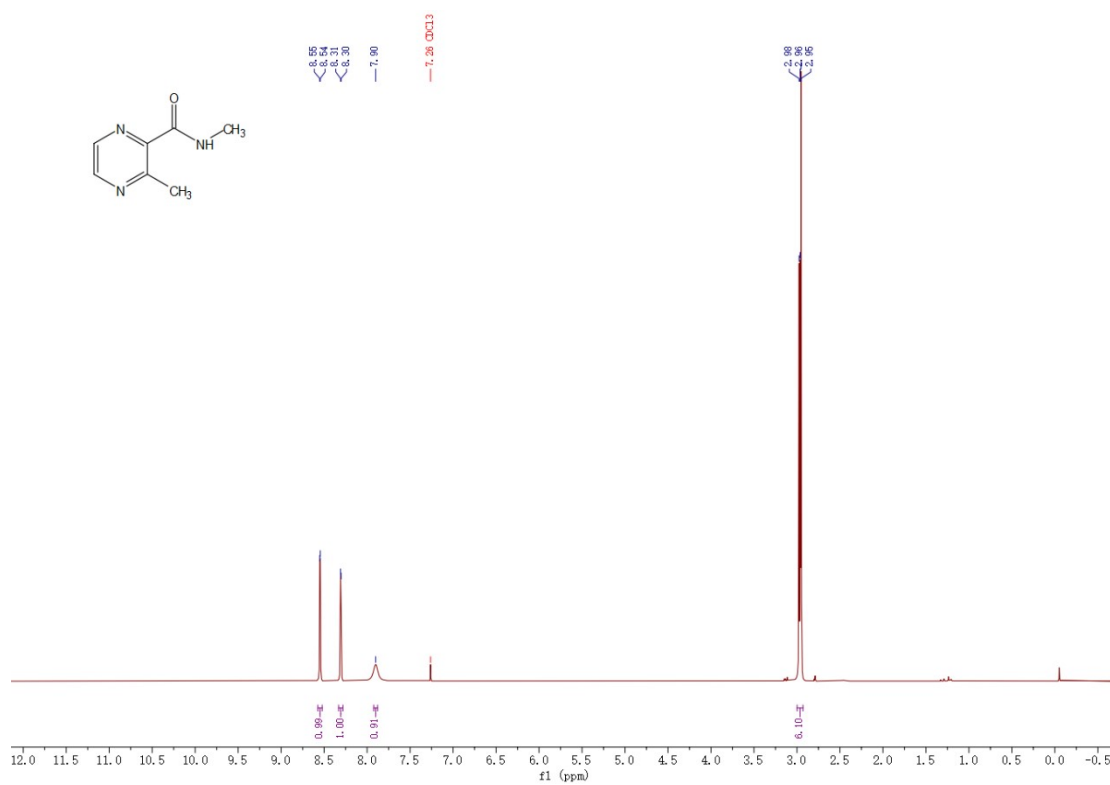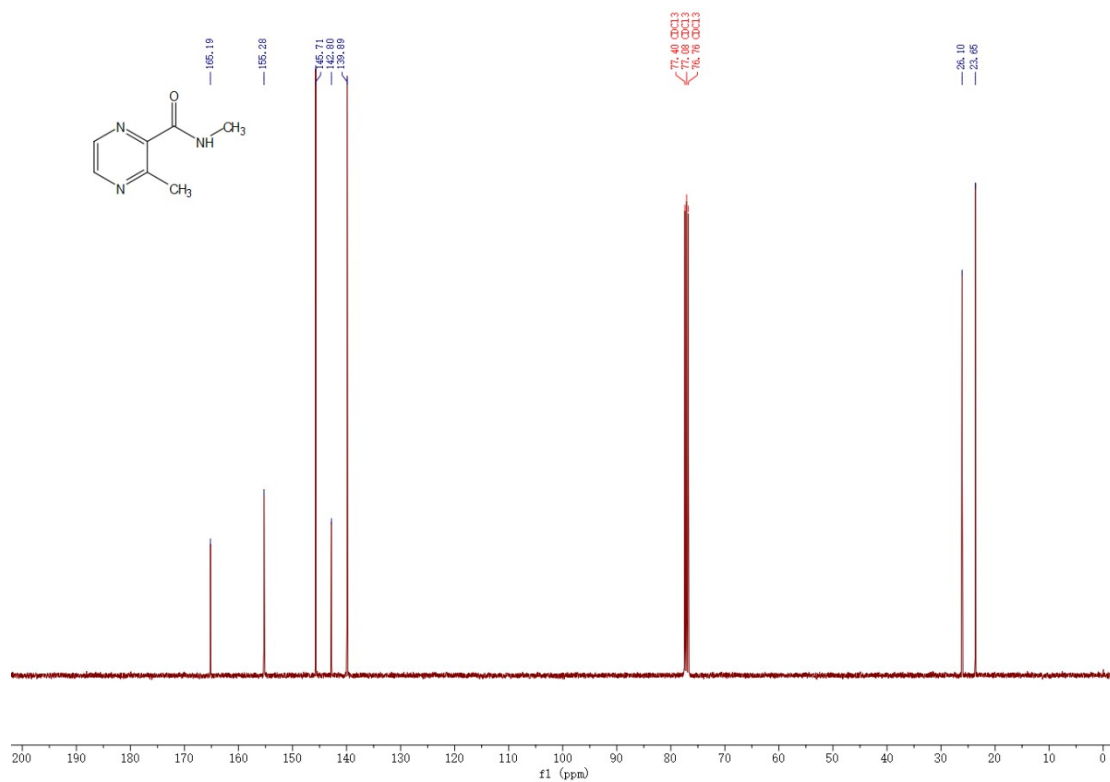

3c

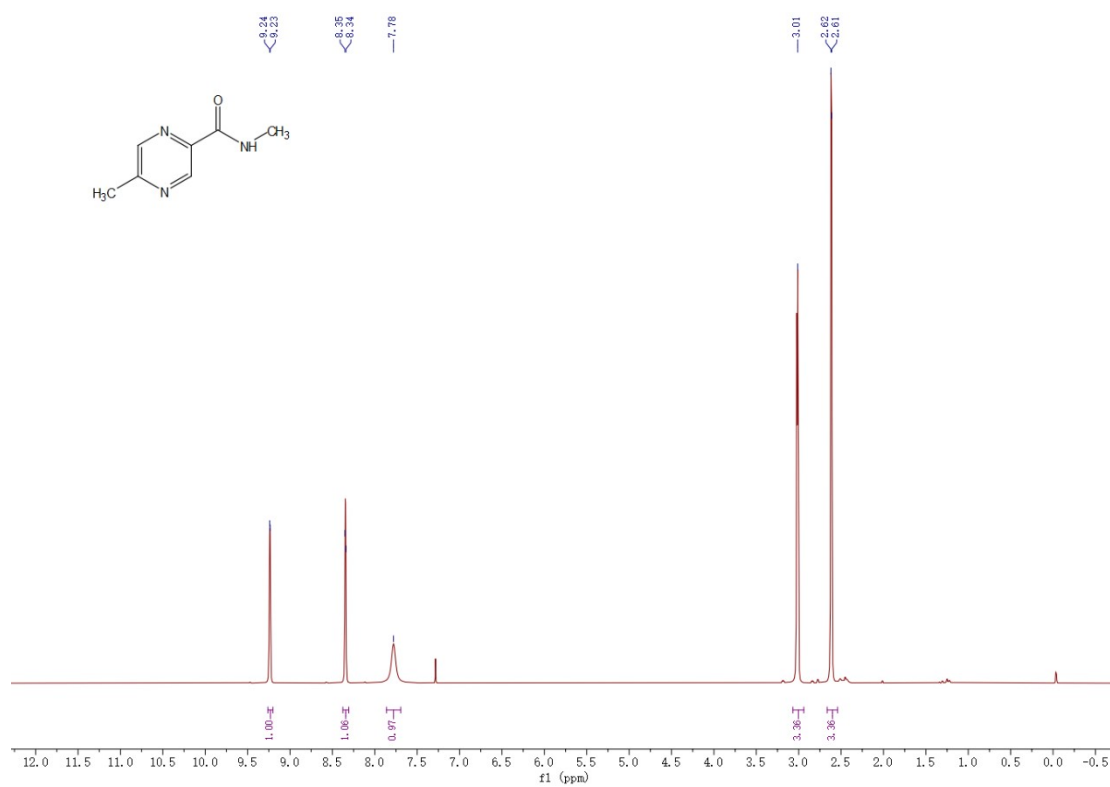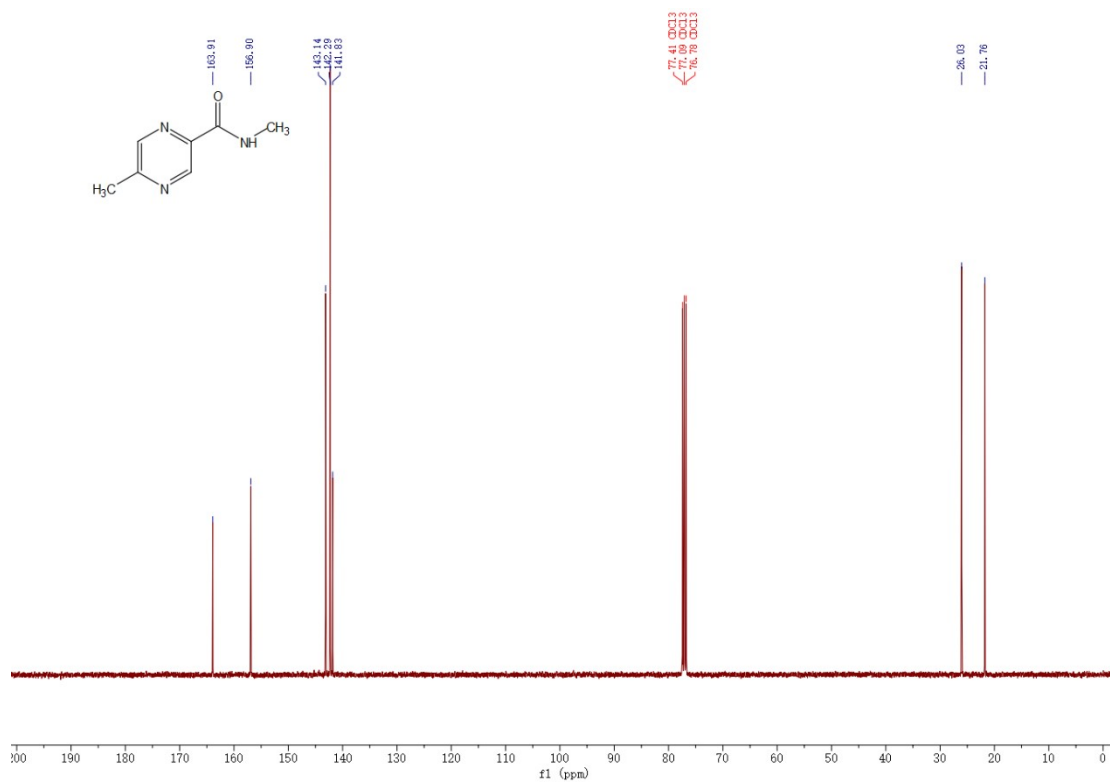

3d

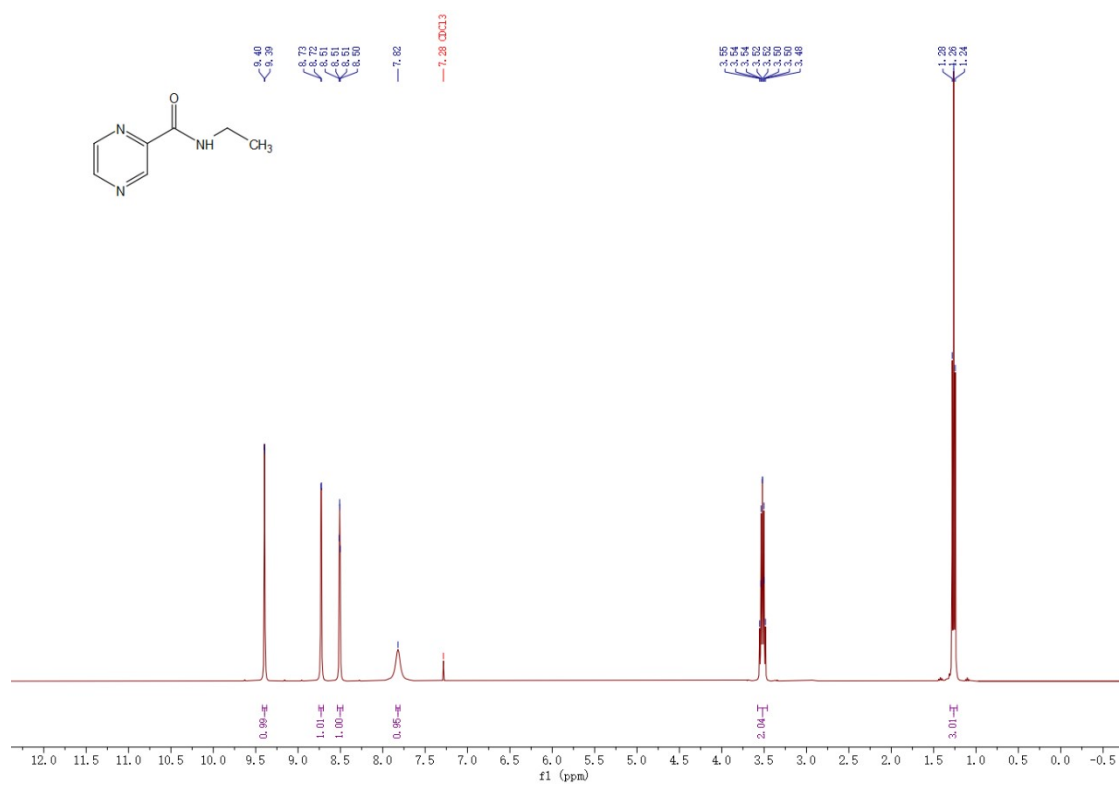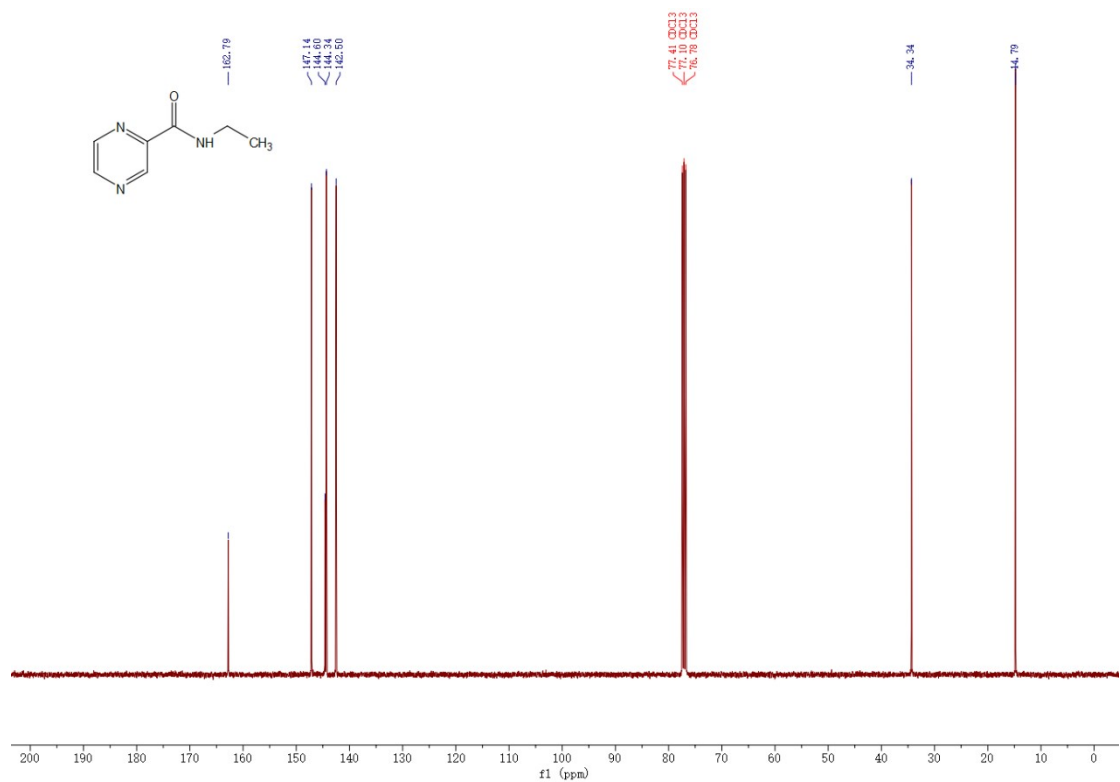

3e

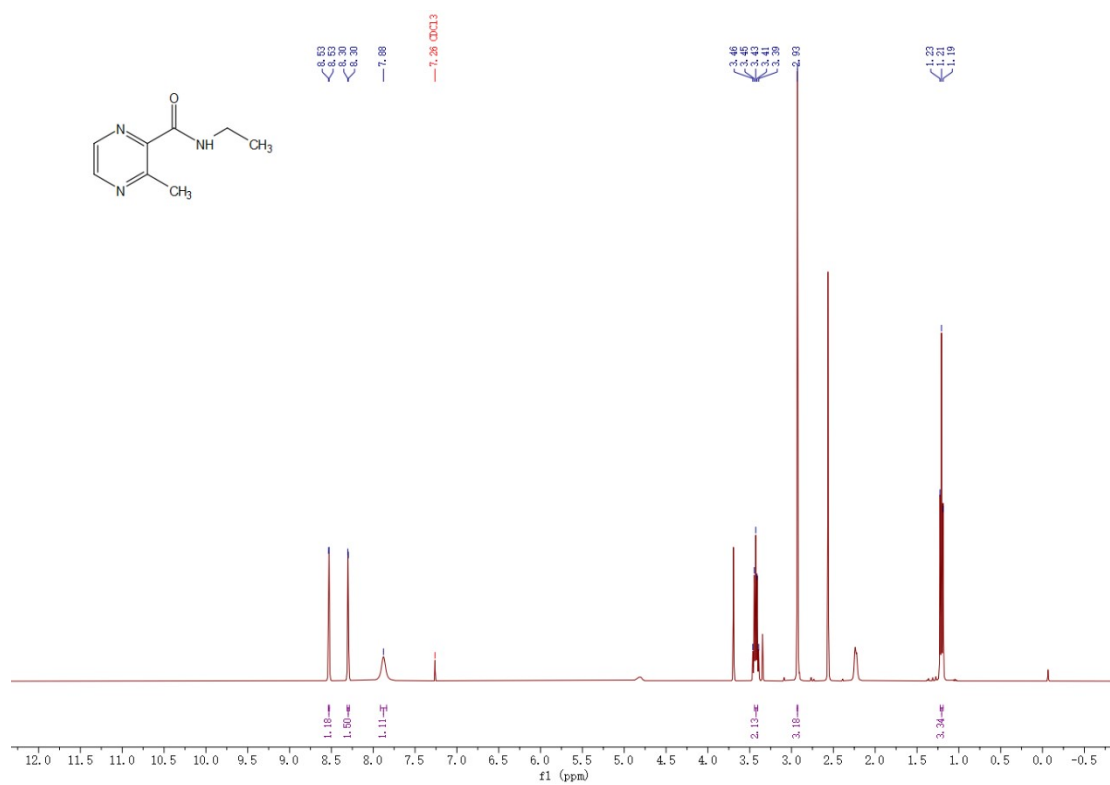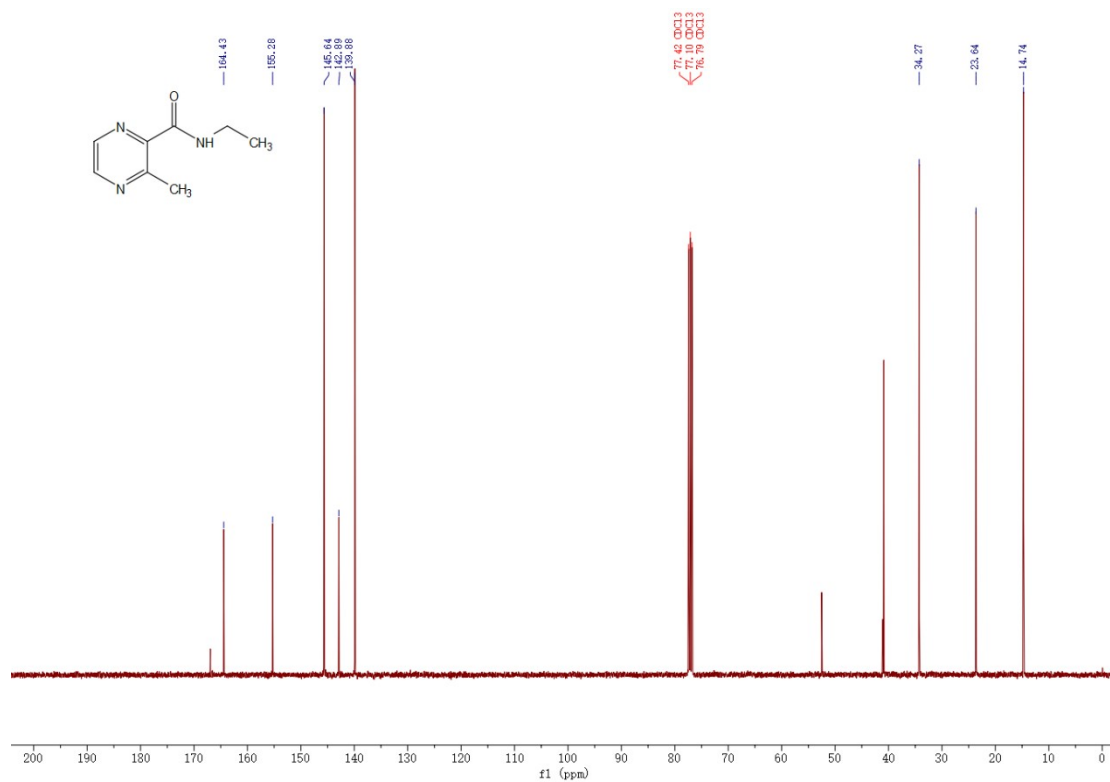

3f

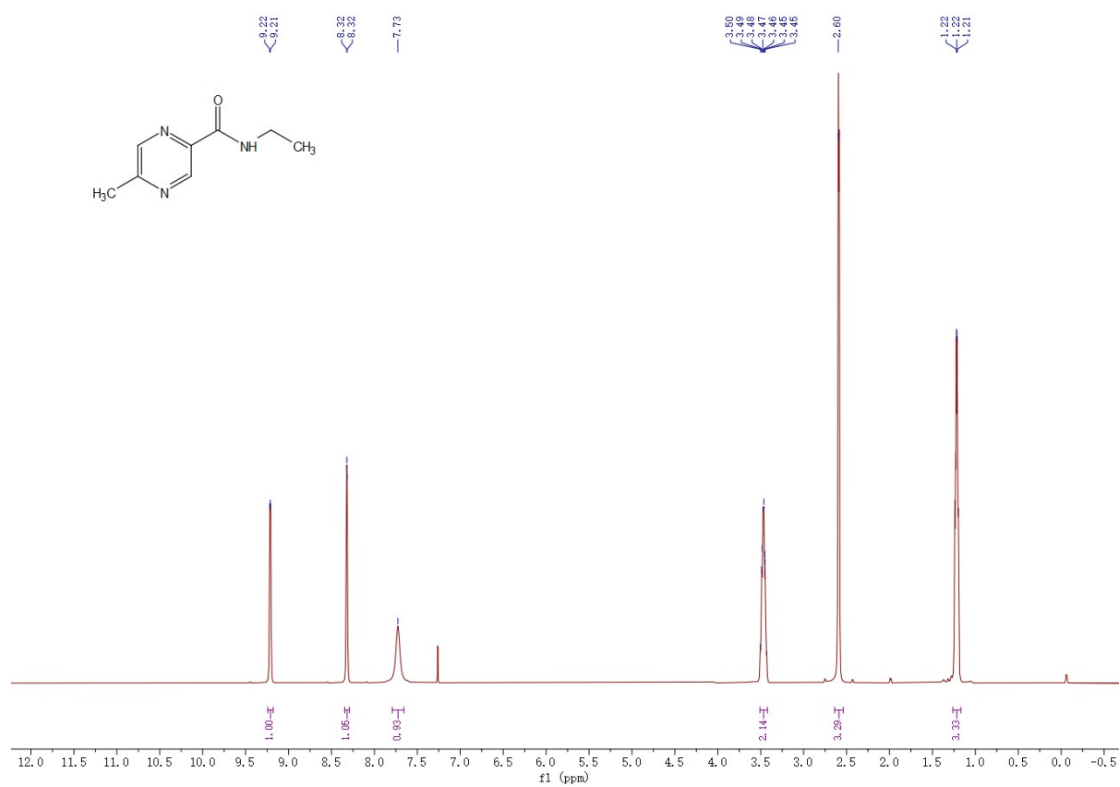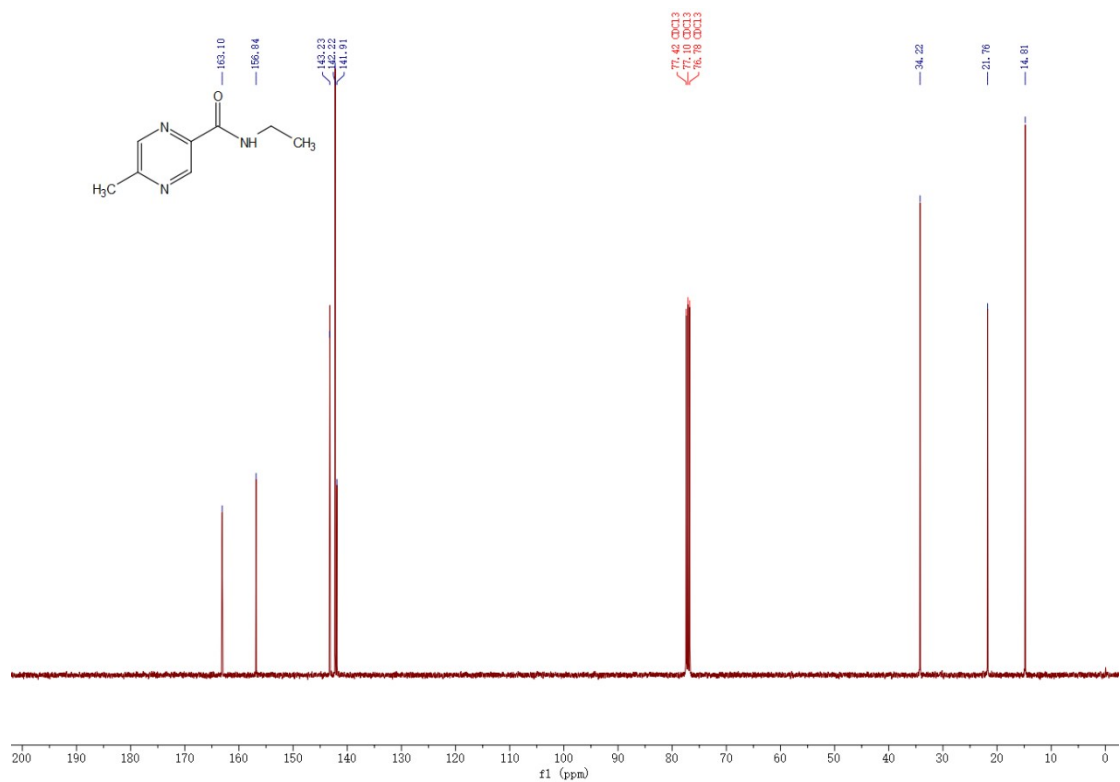

3g

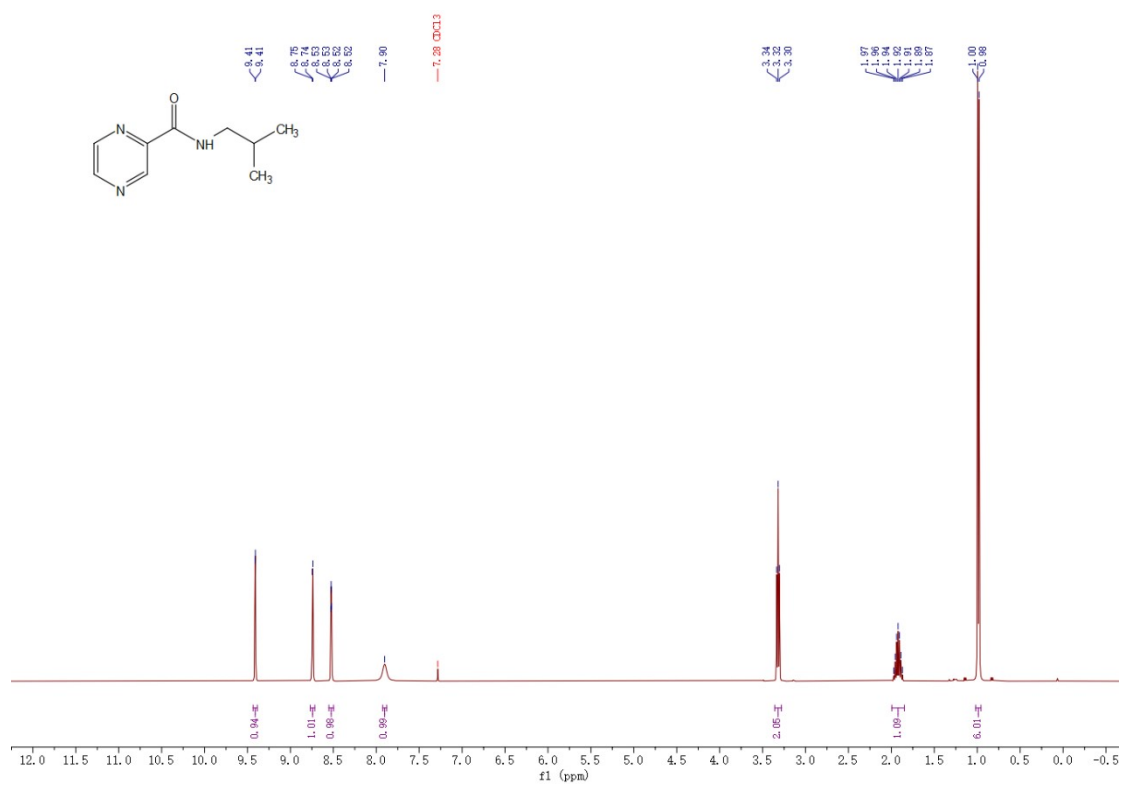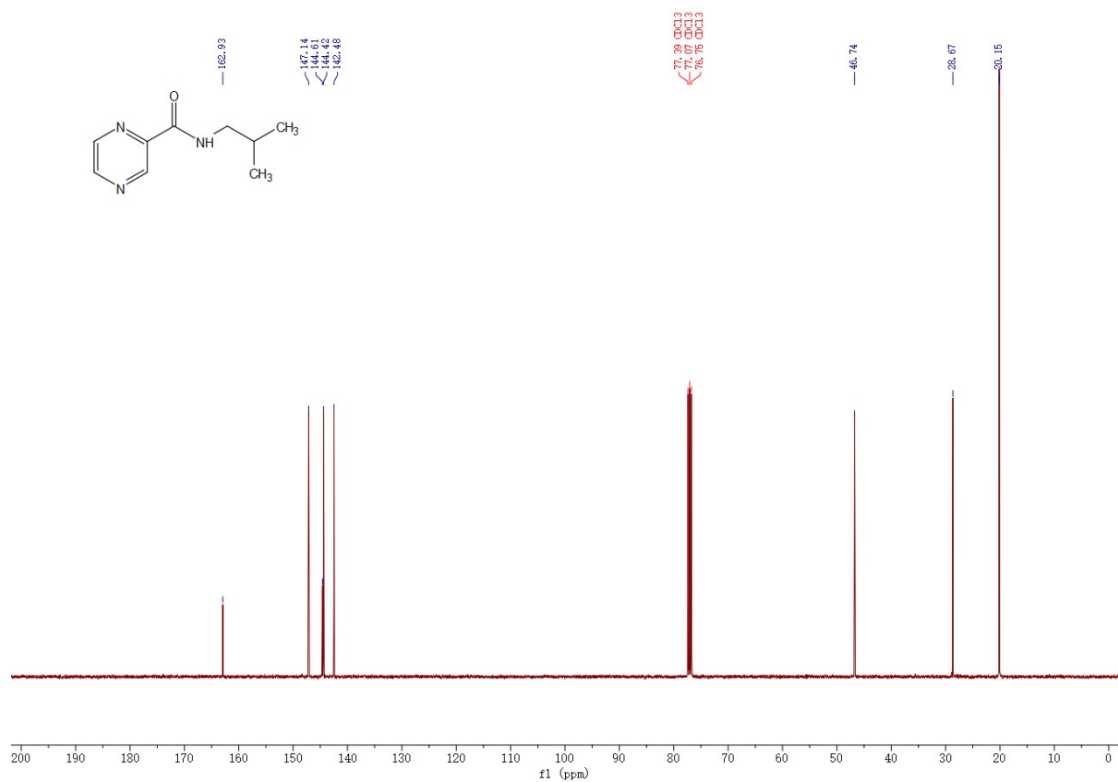

3h

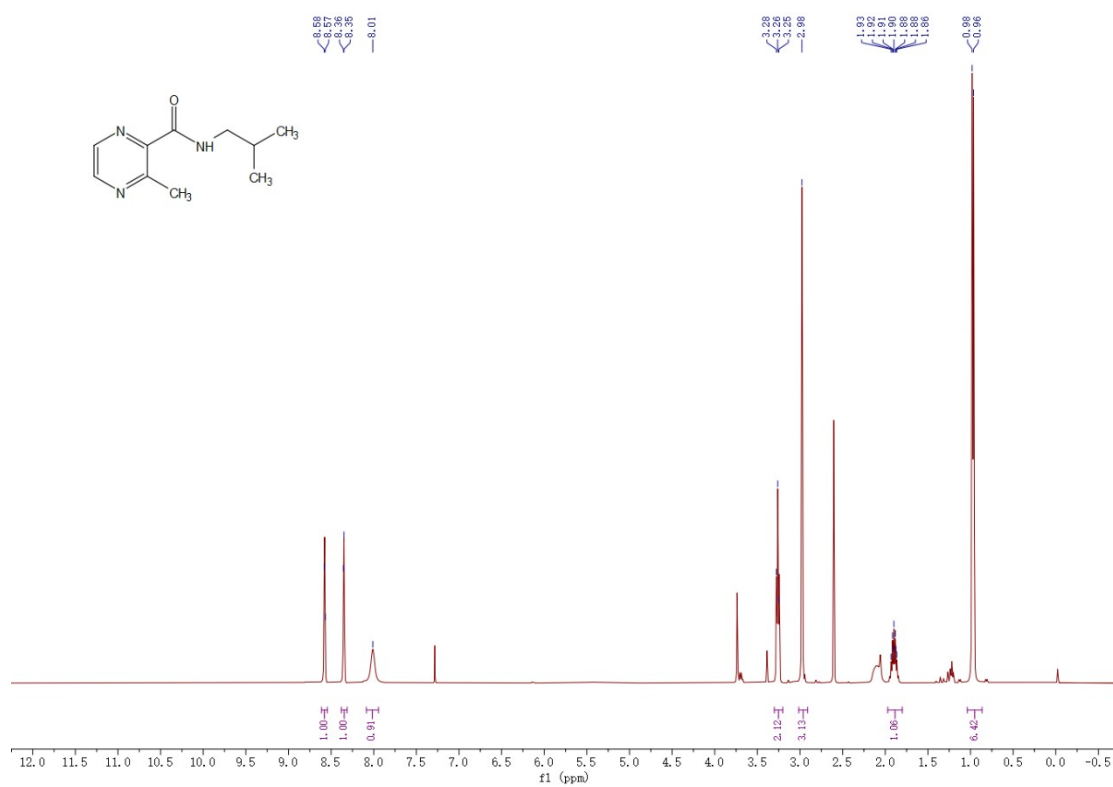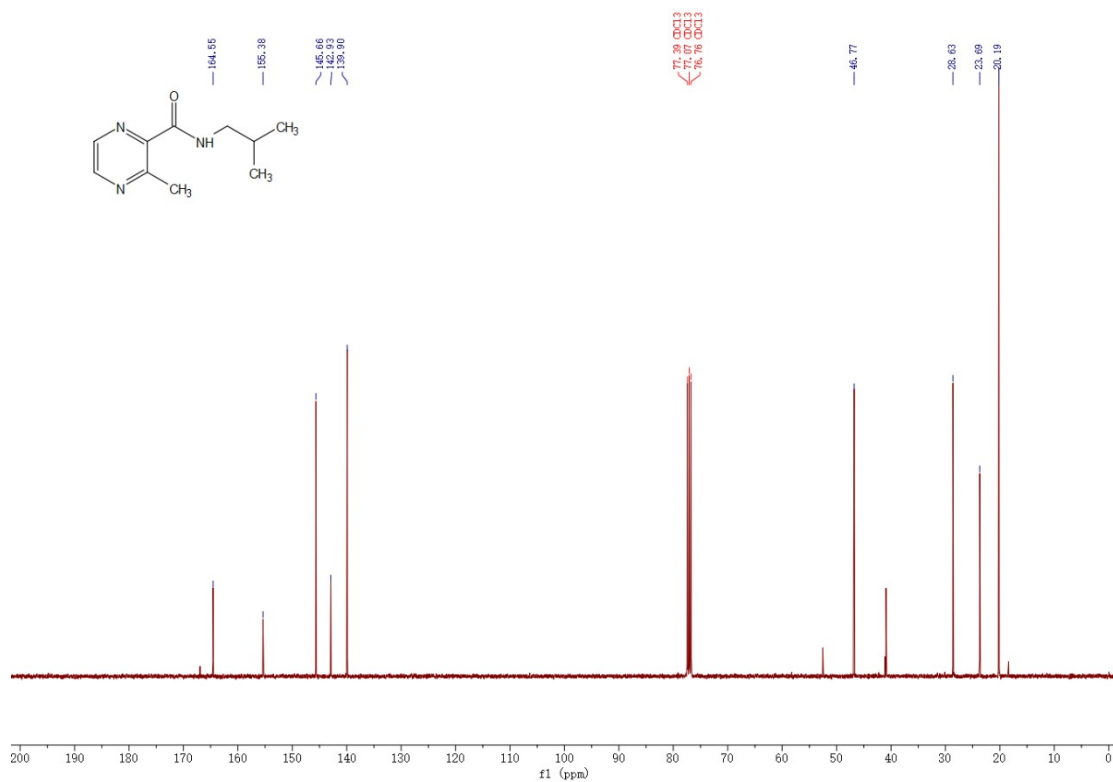



3i

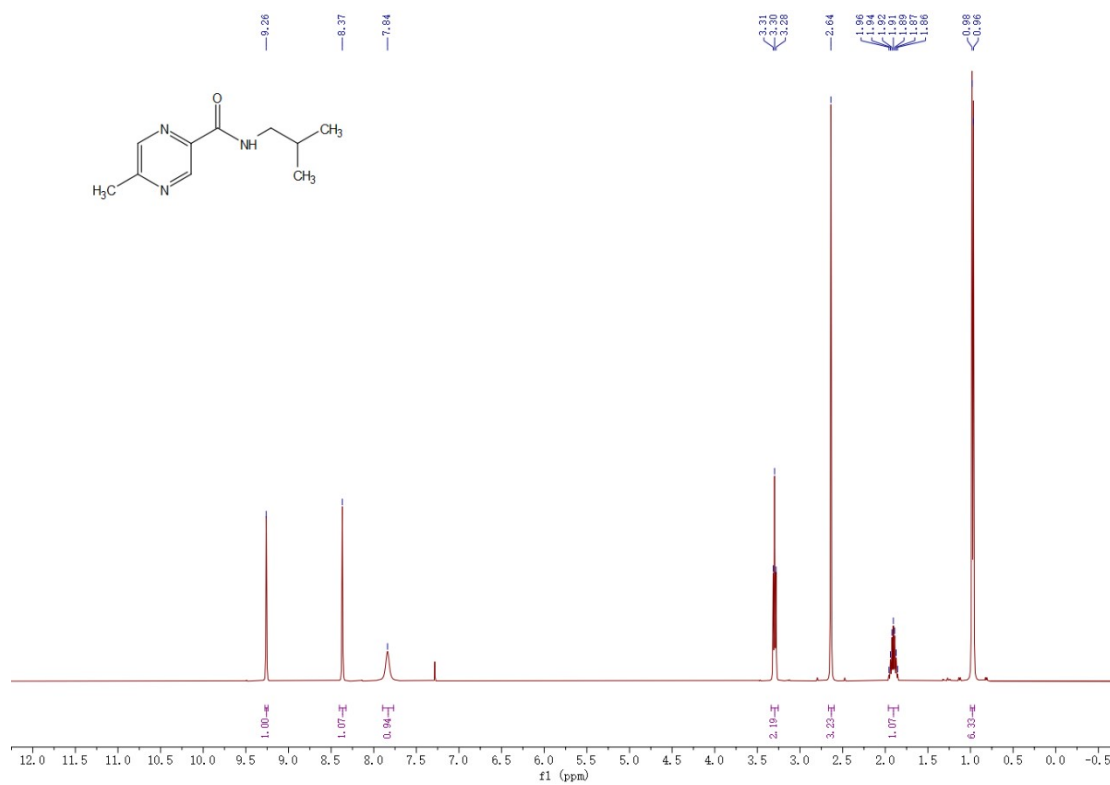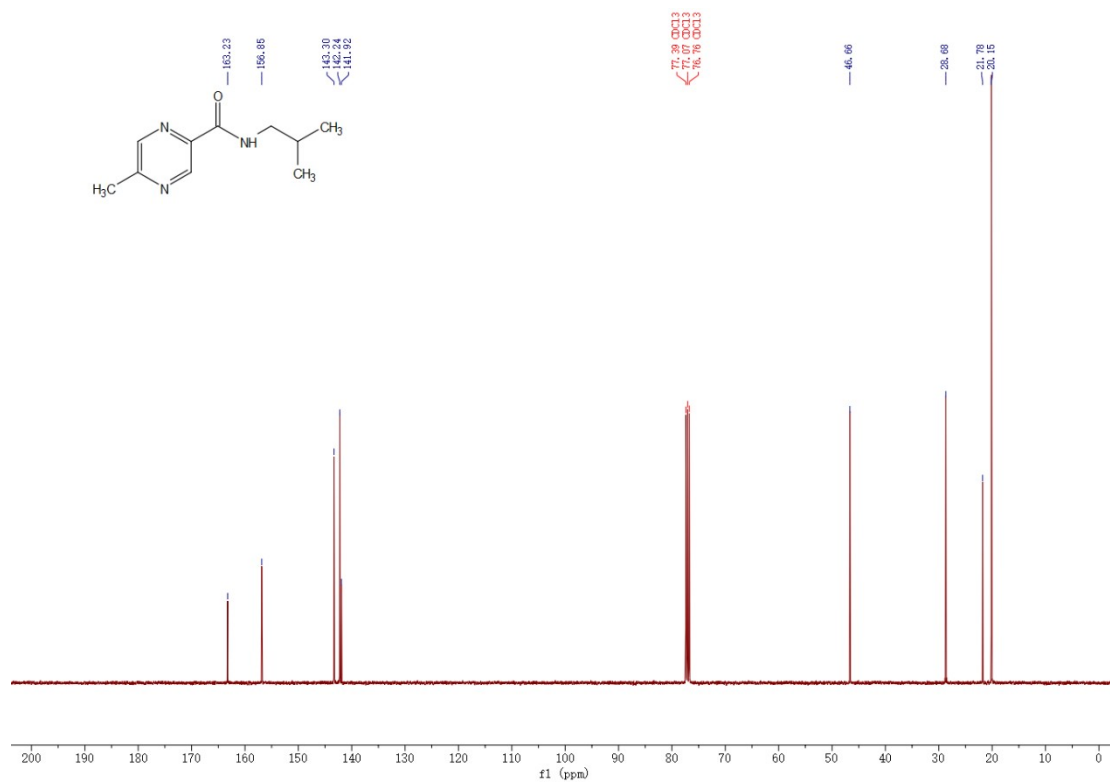

3j

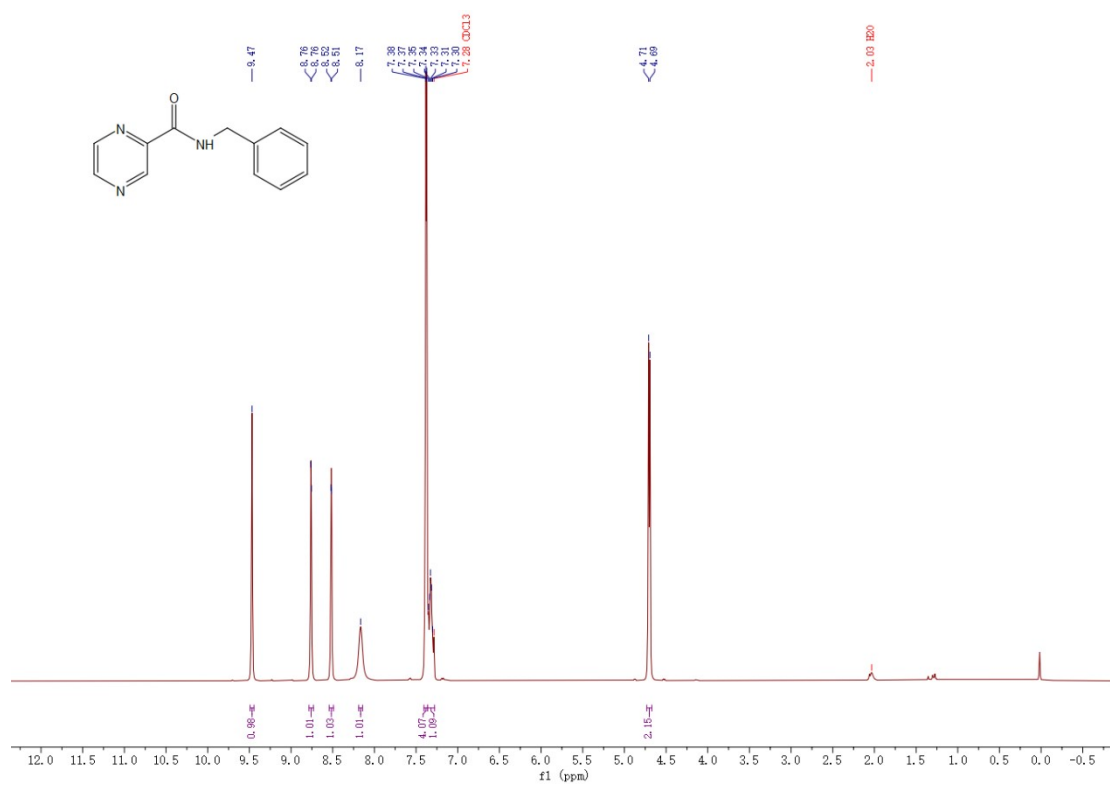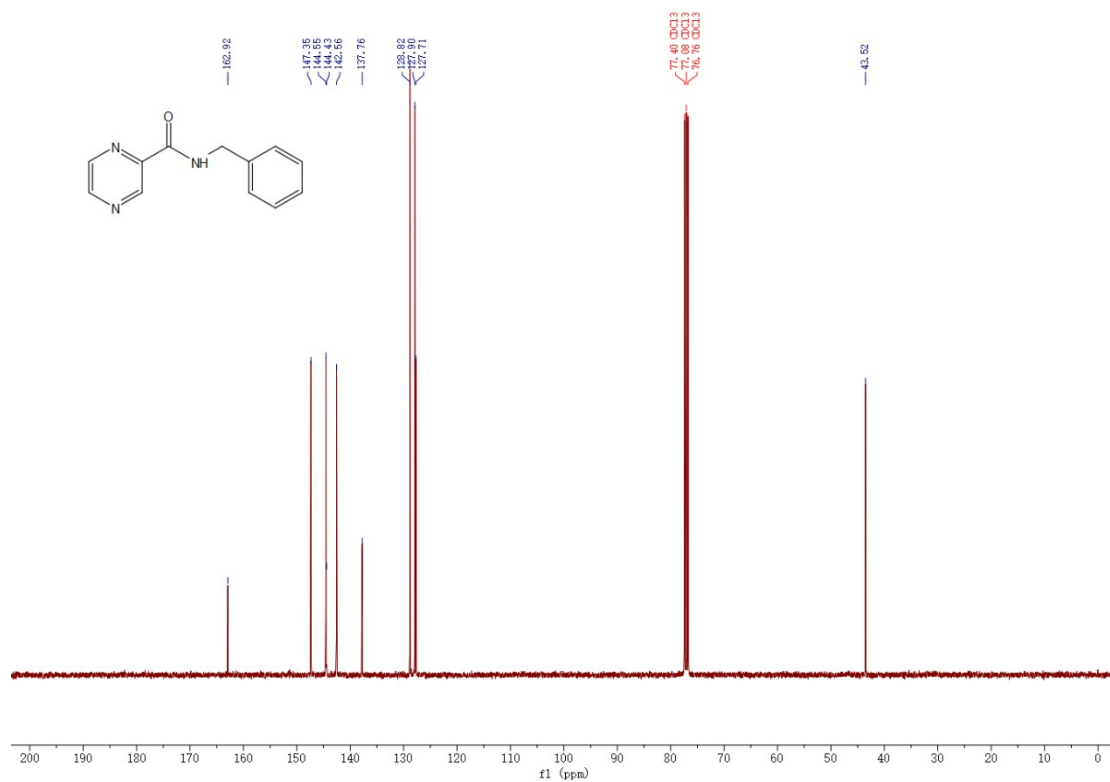

3k

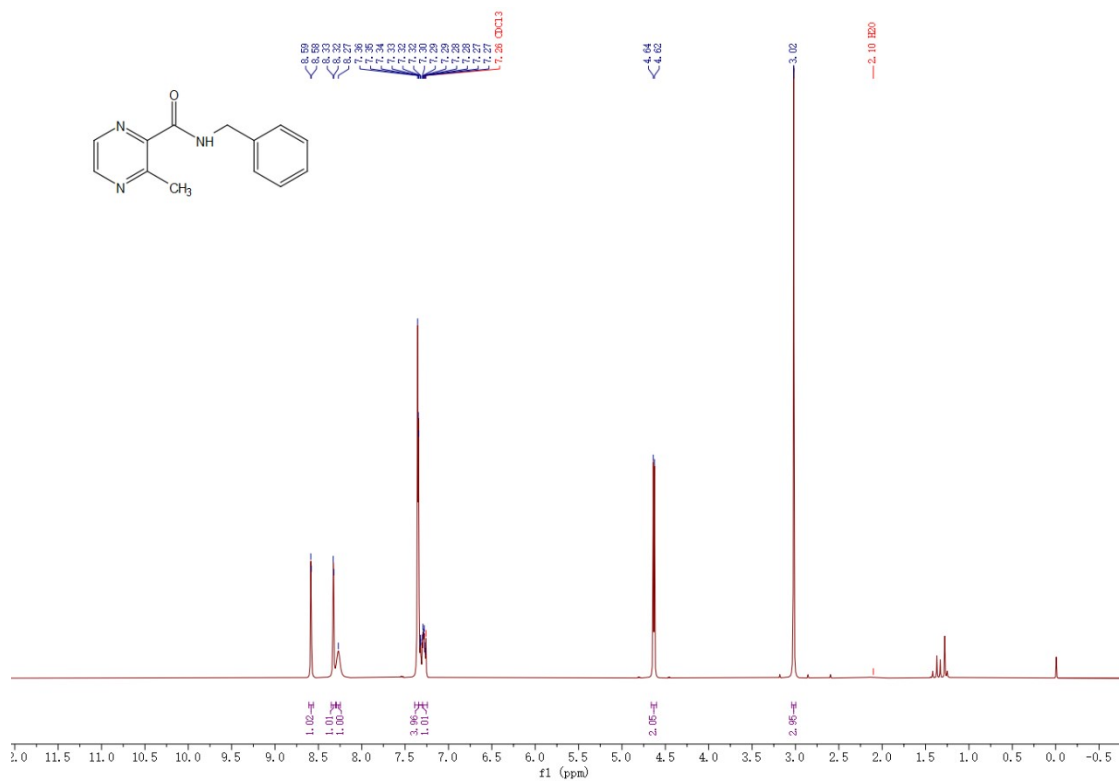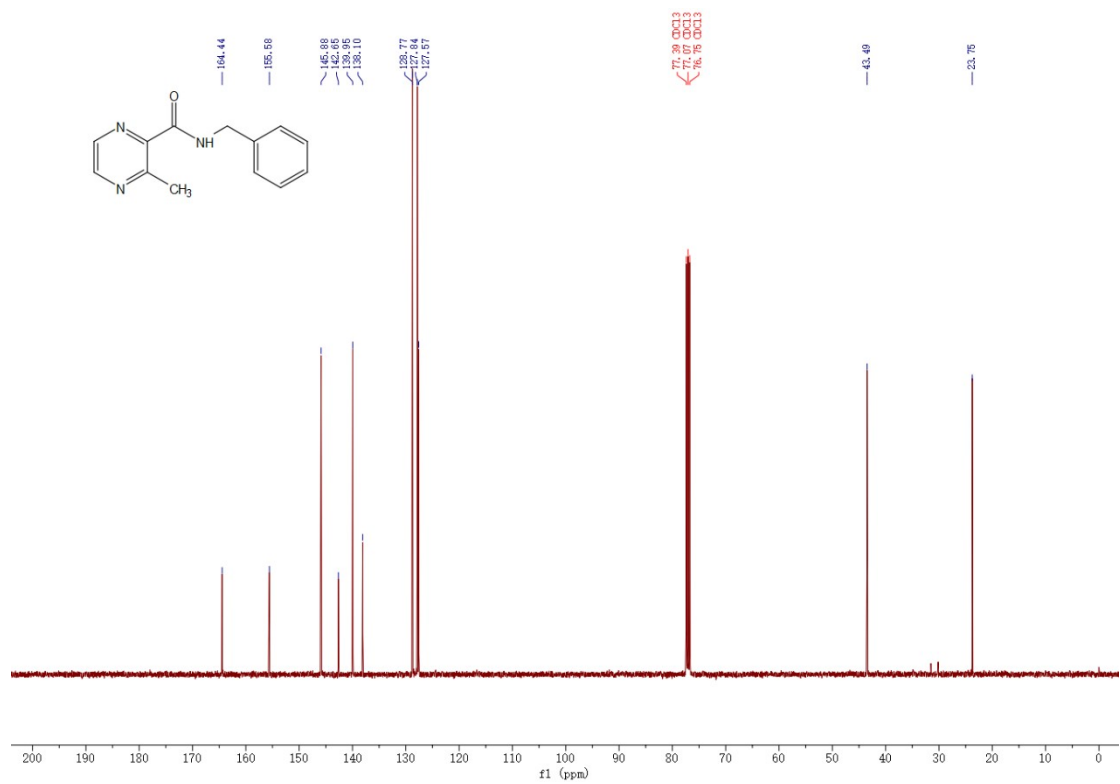

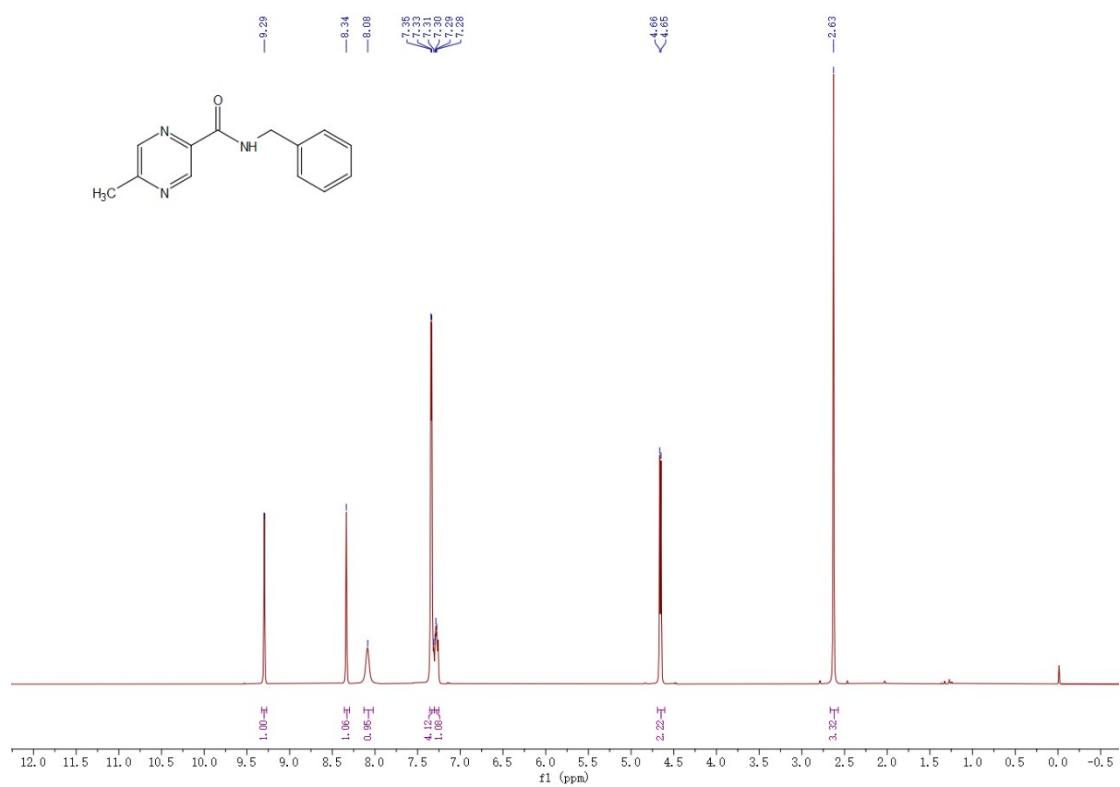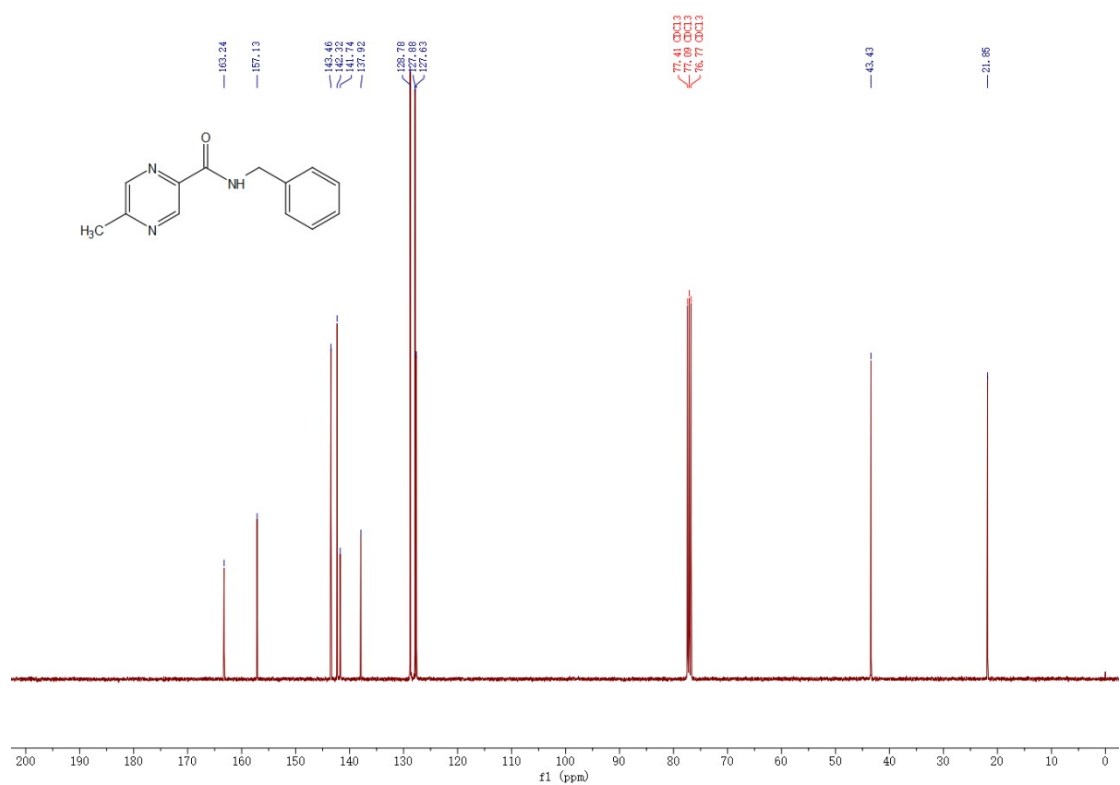

3m

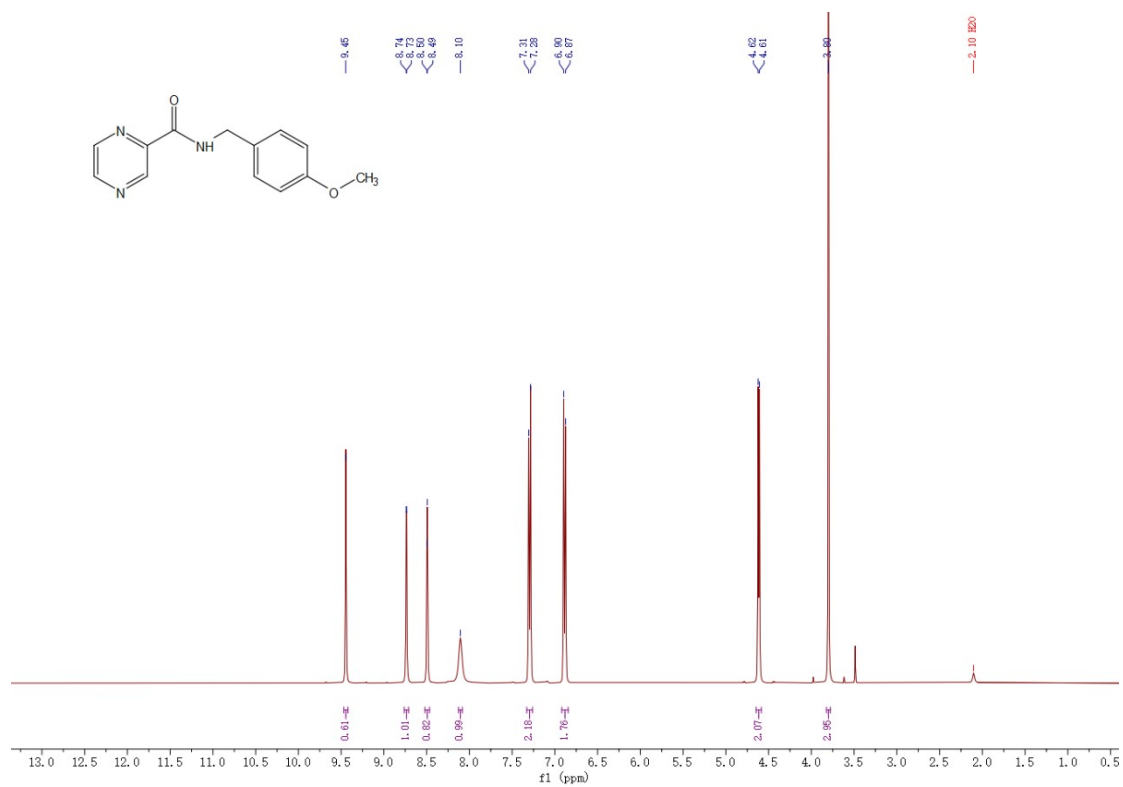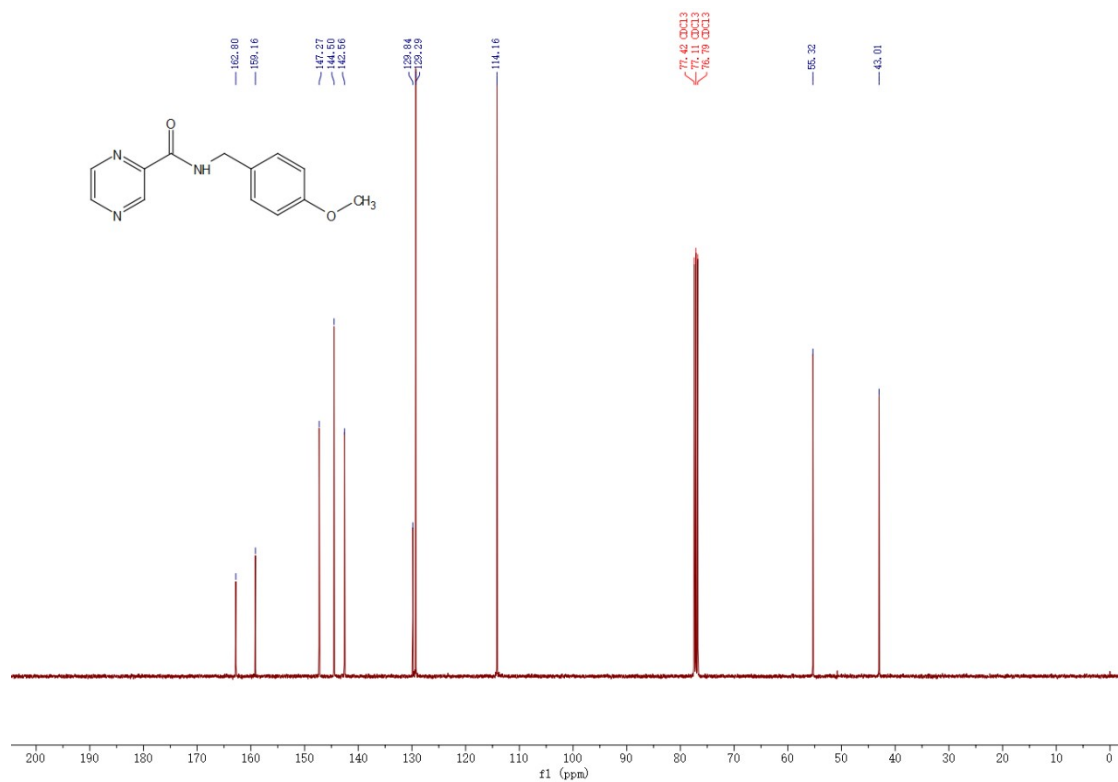

3n

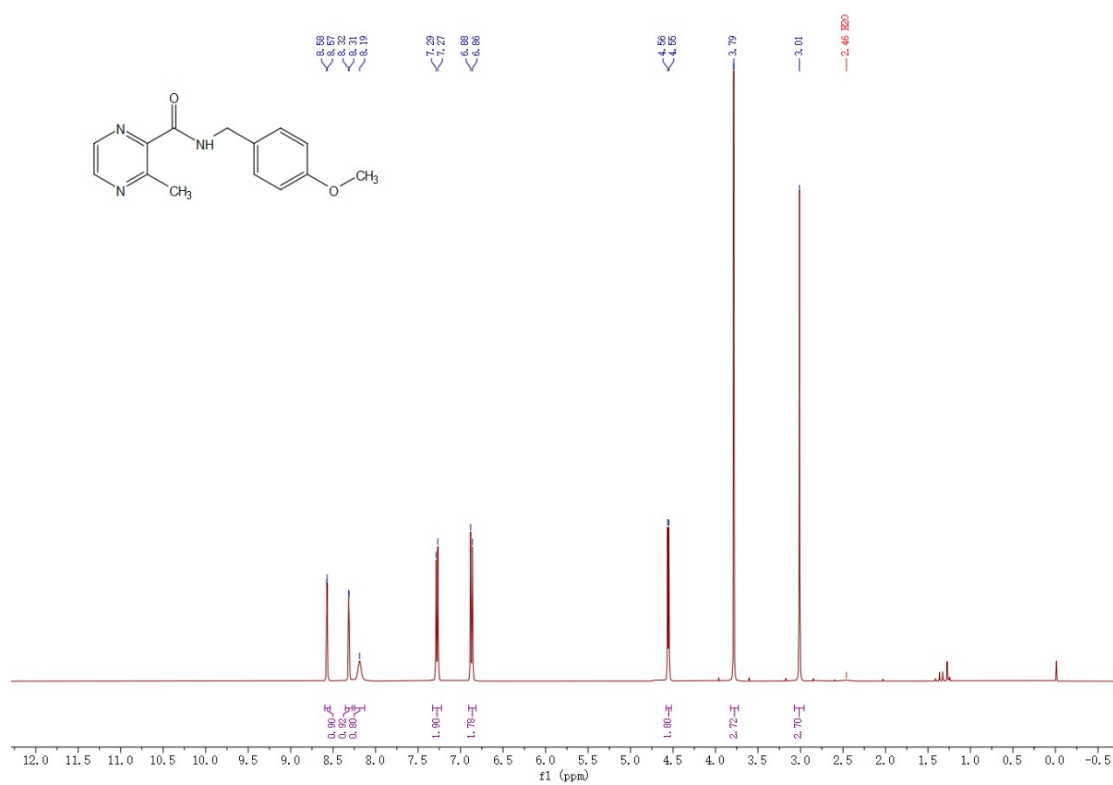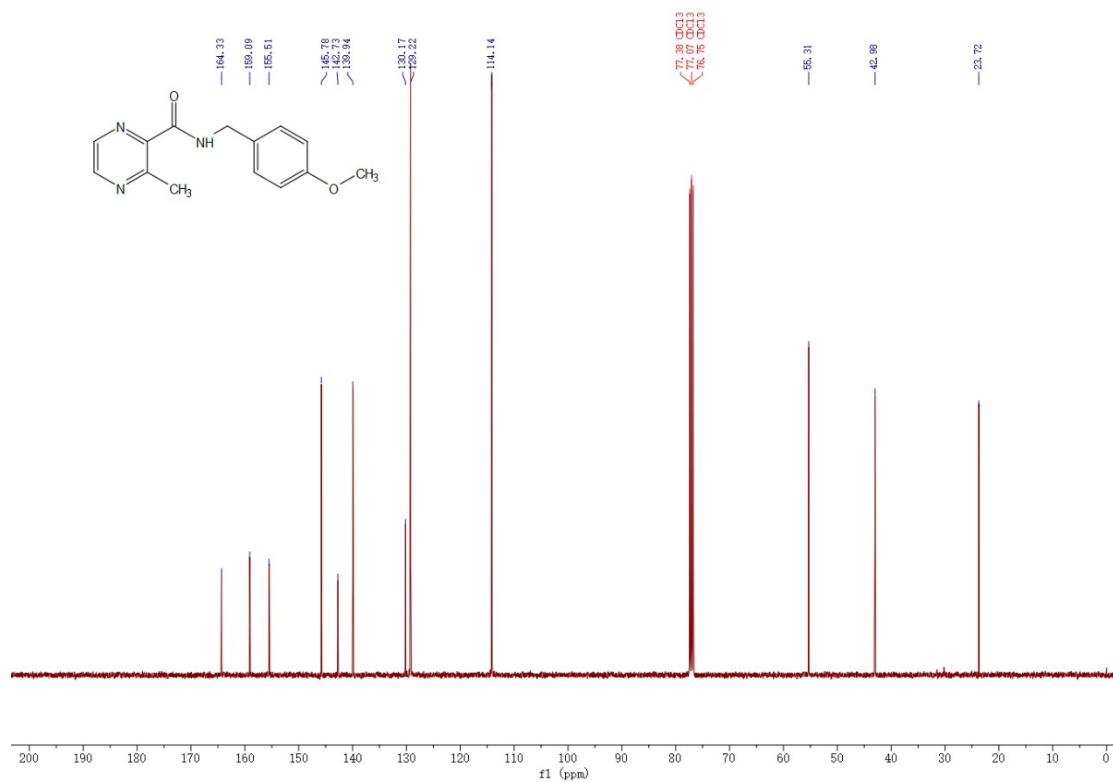

3o

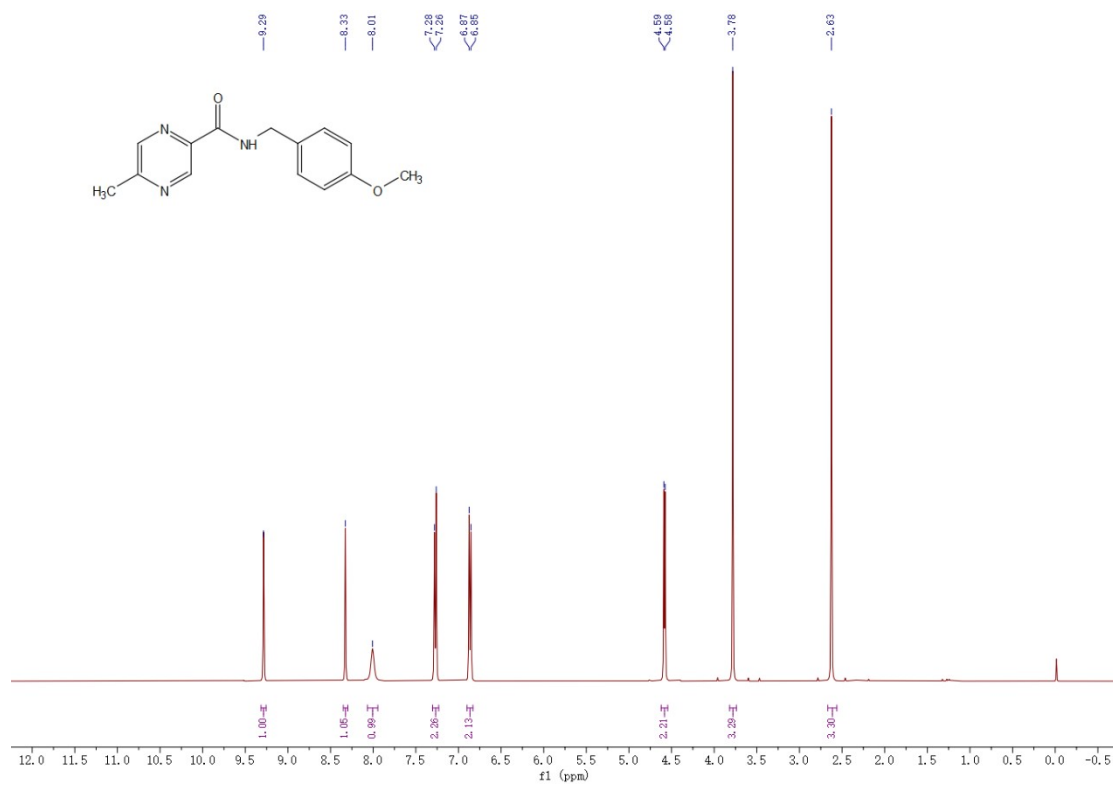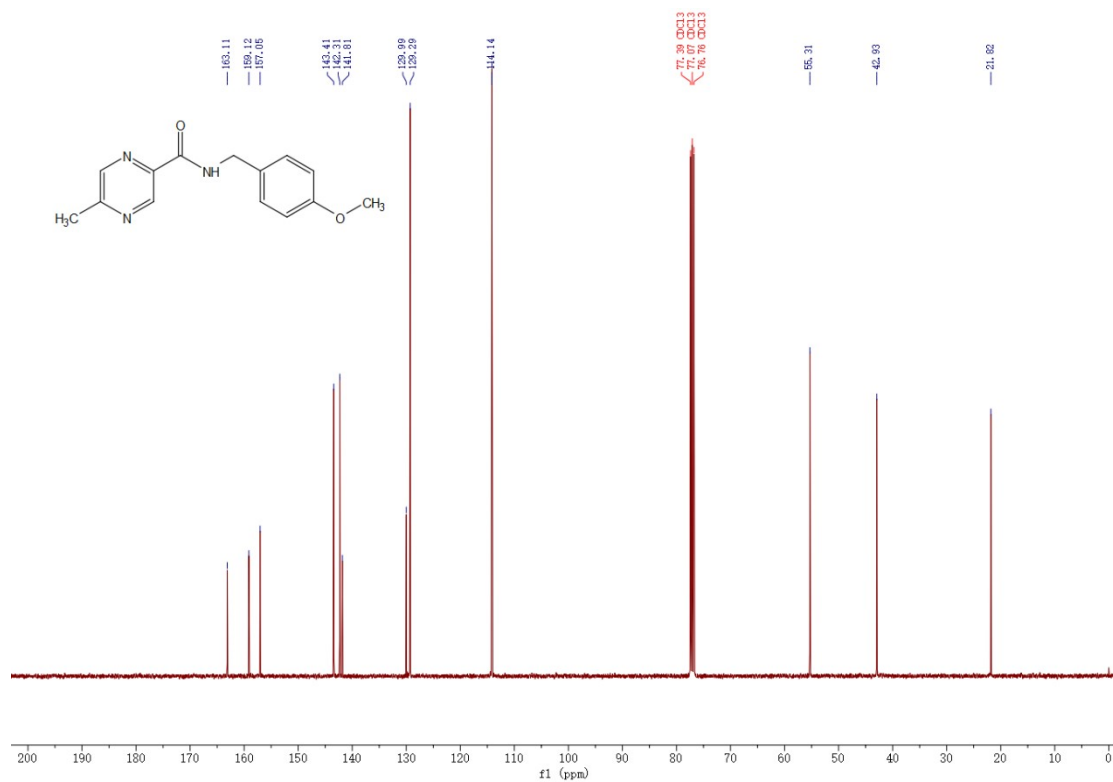

3p

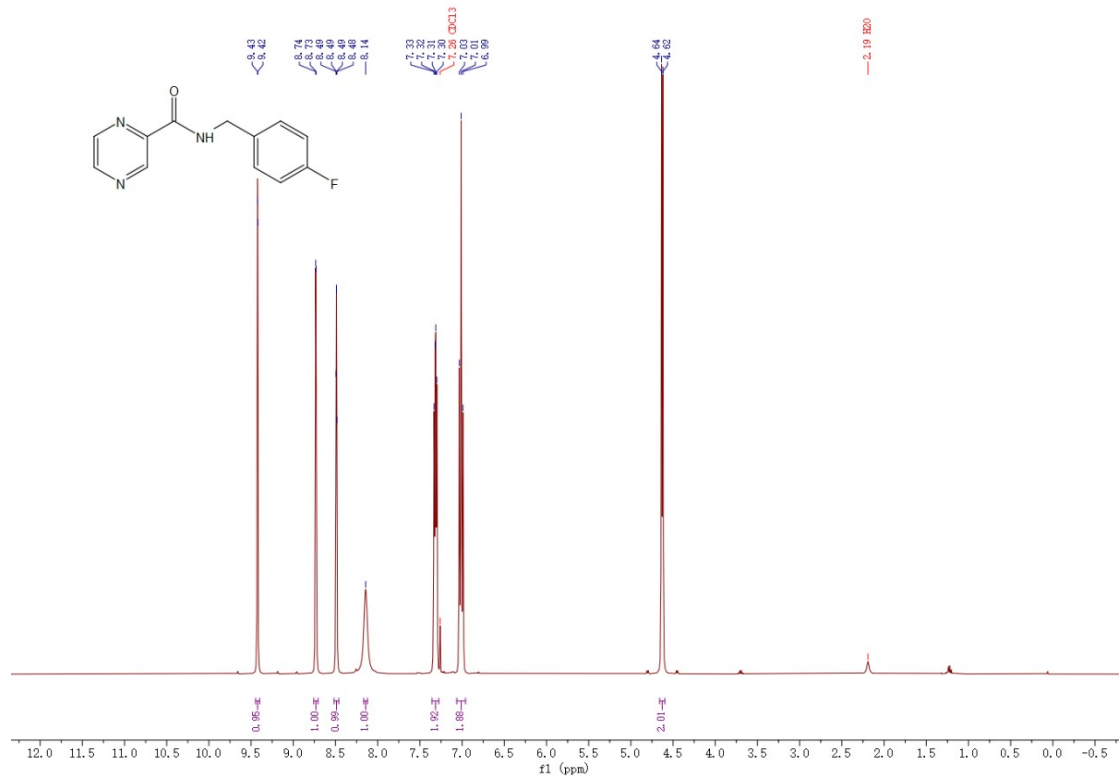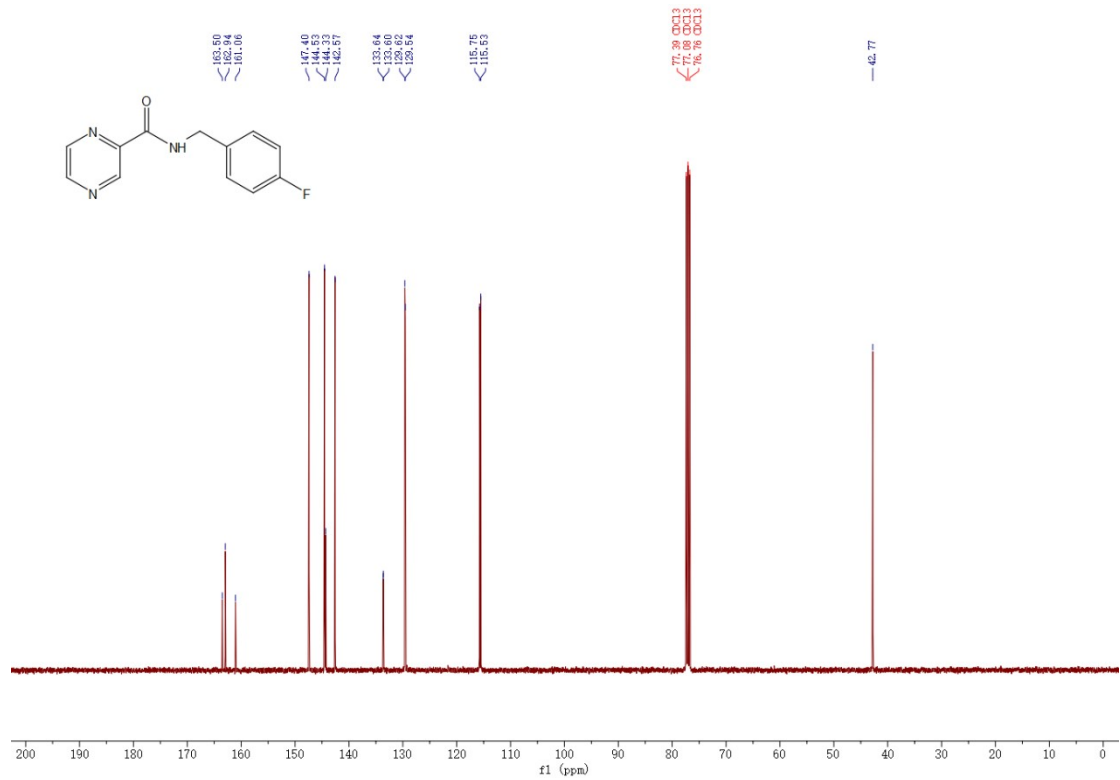



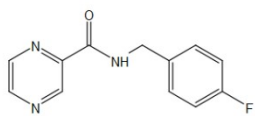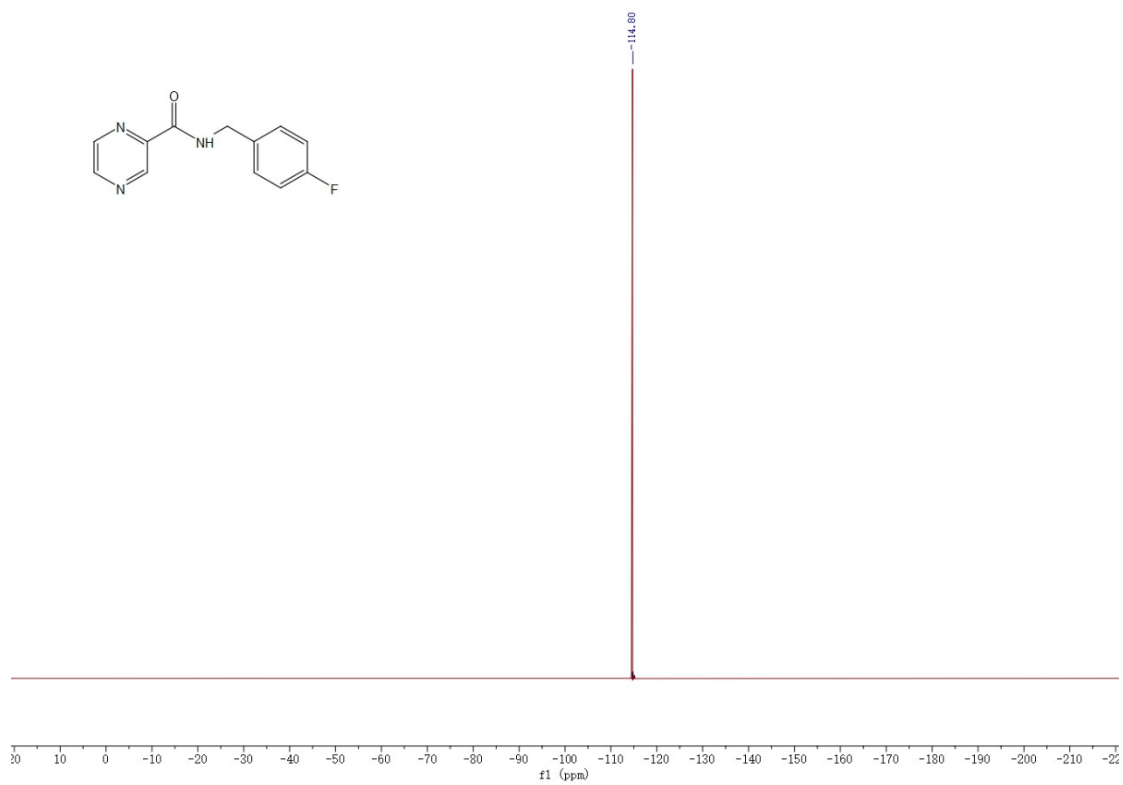

3q

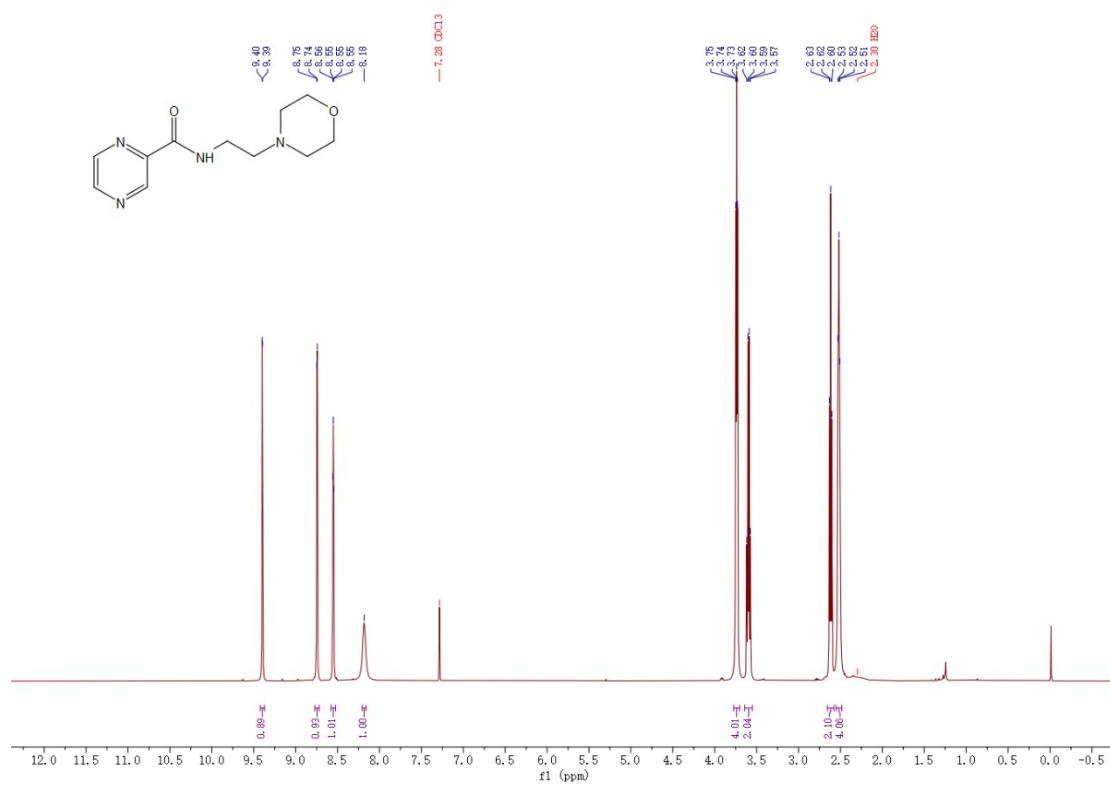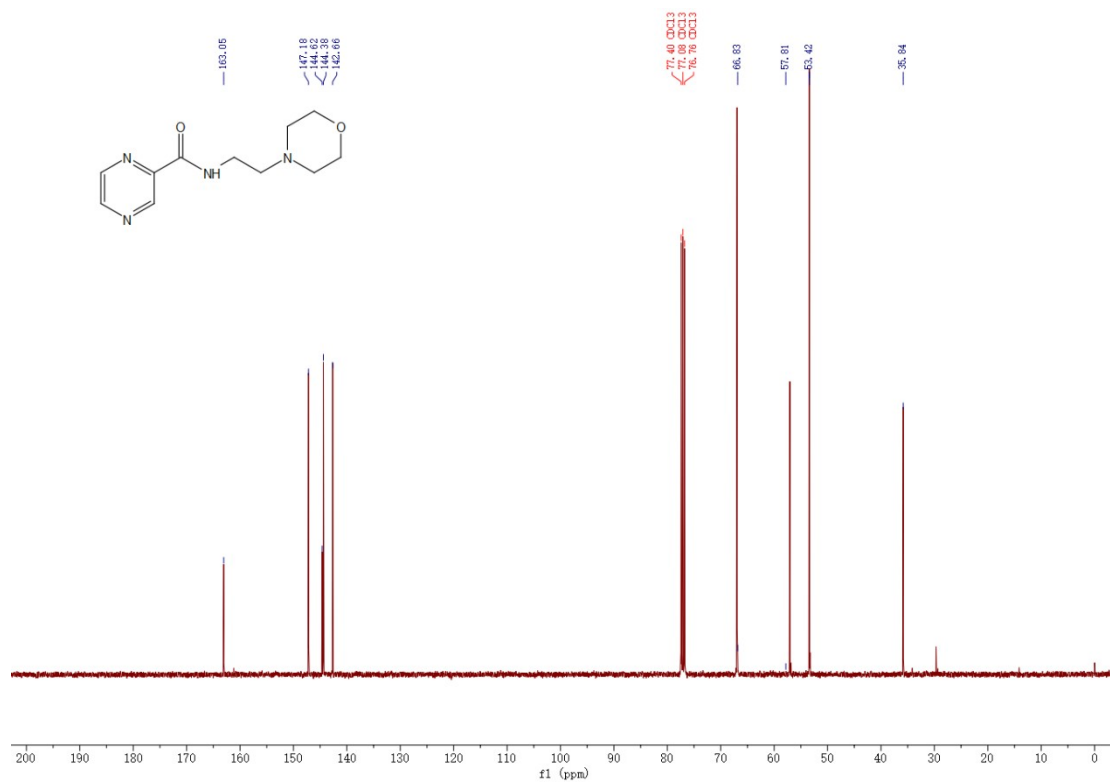

3r

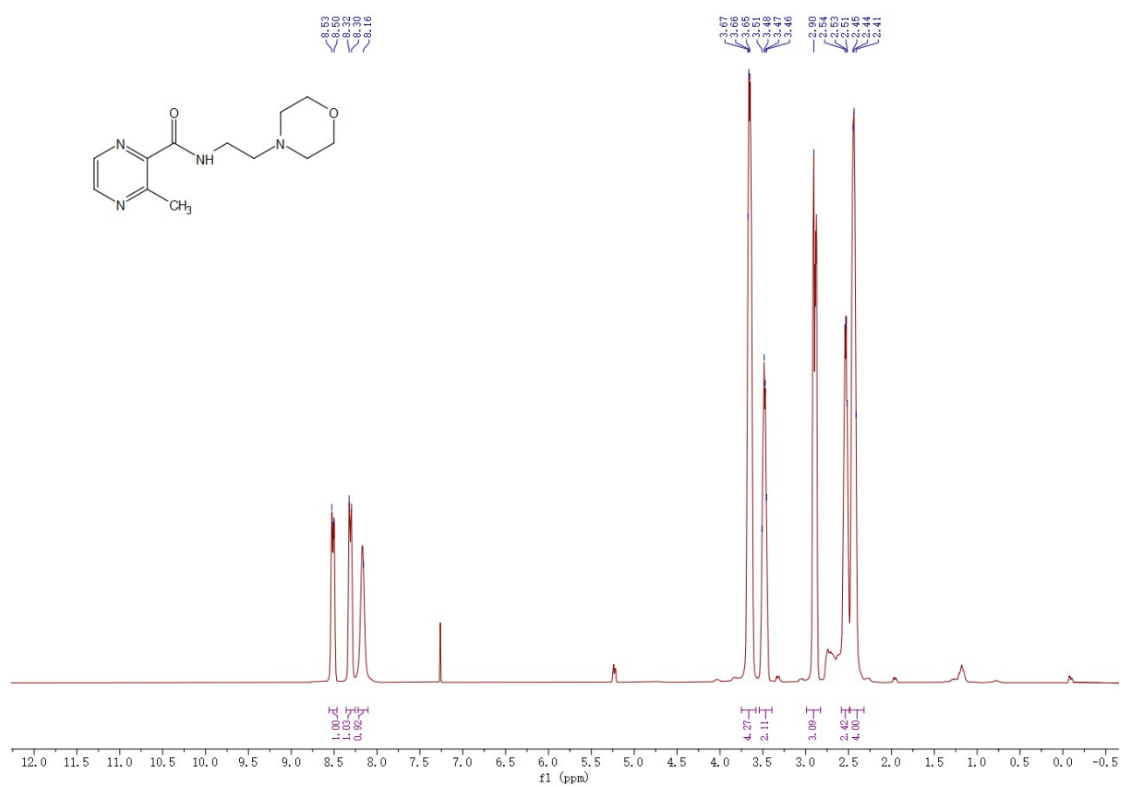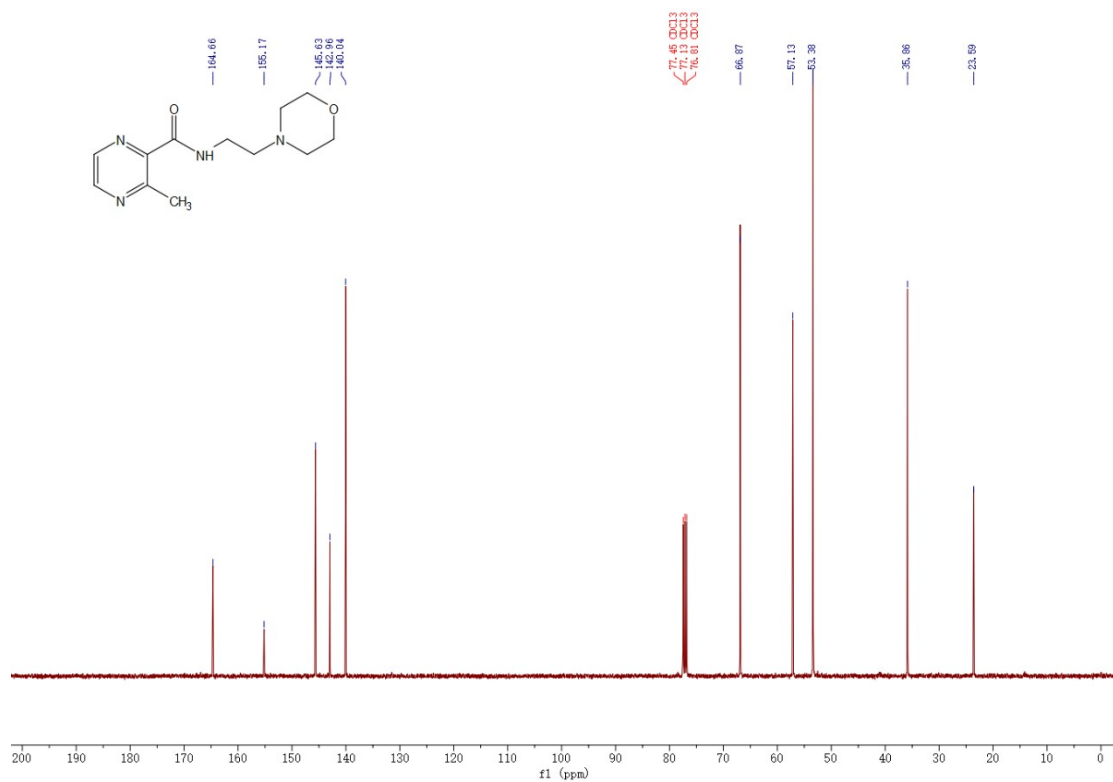

3s

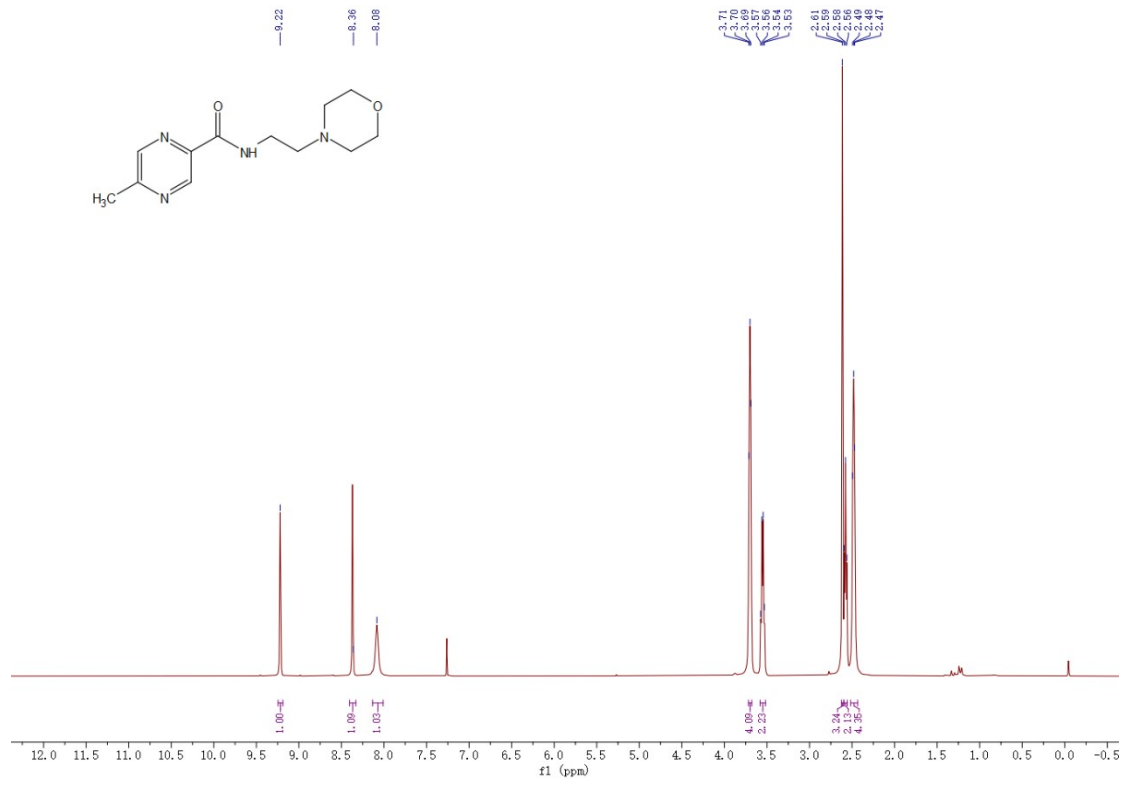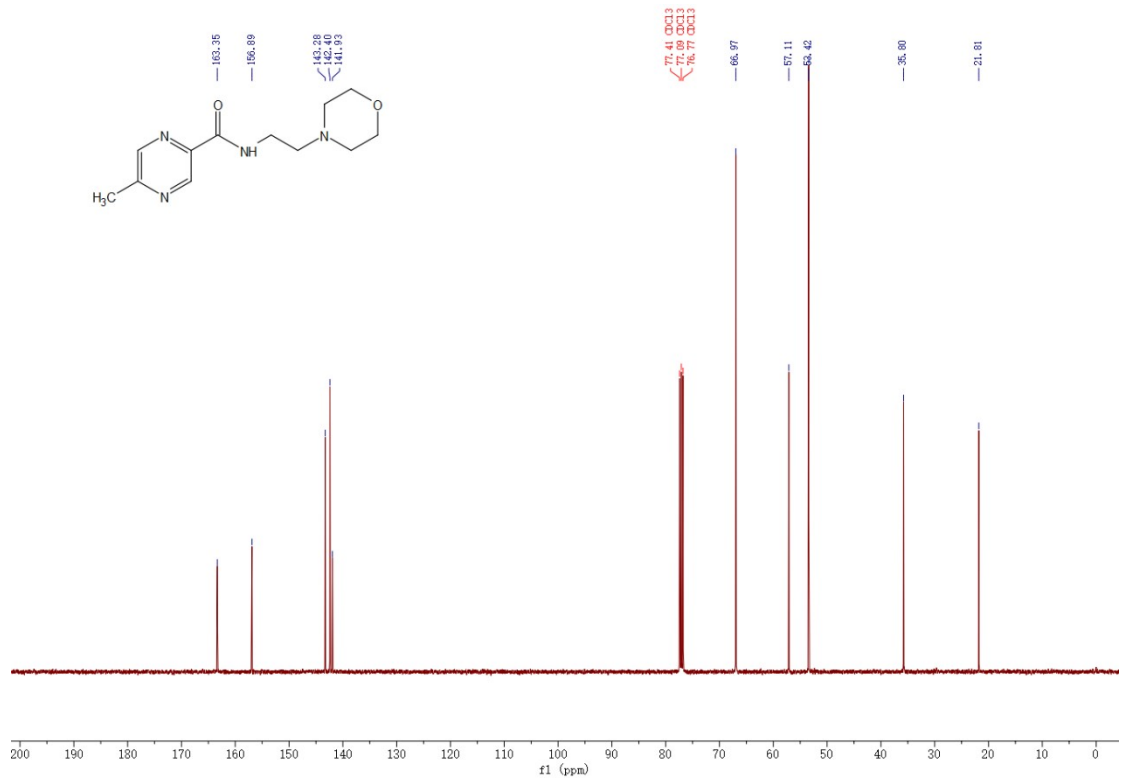

3t

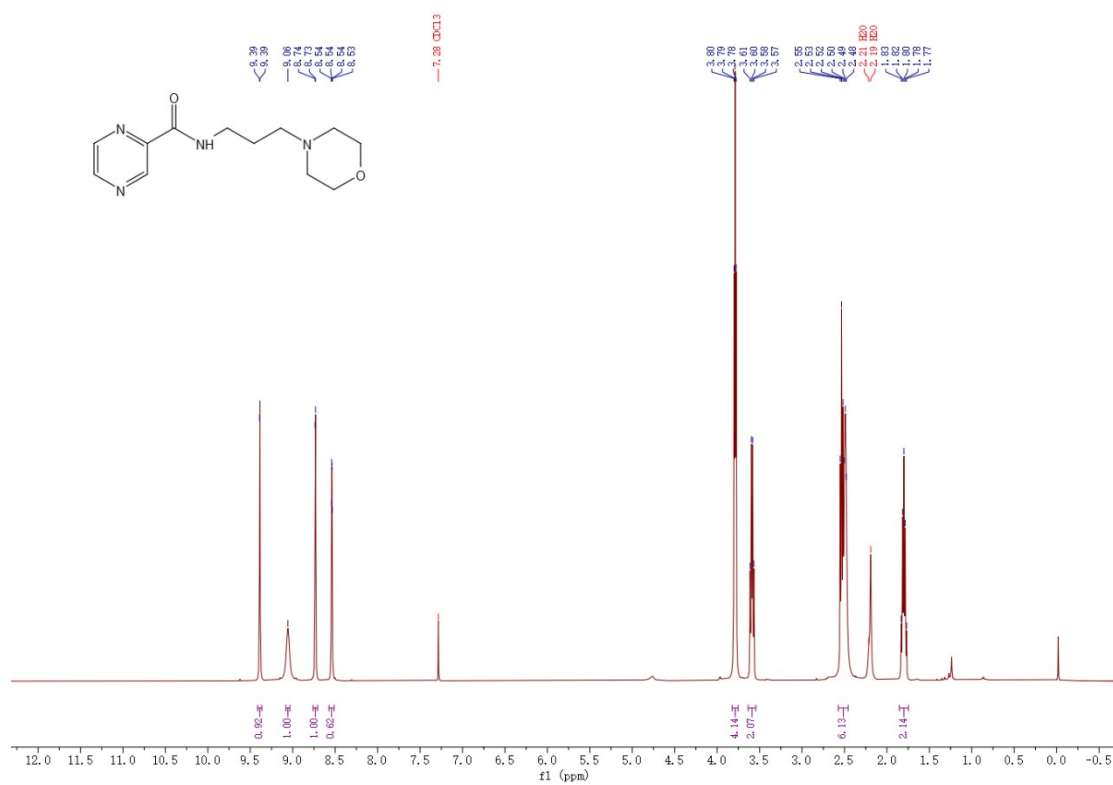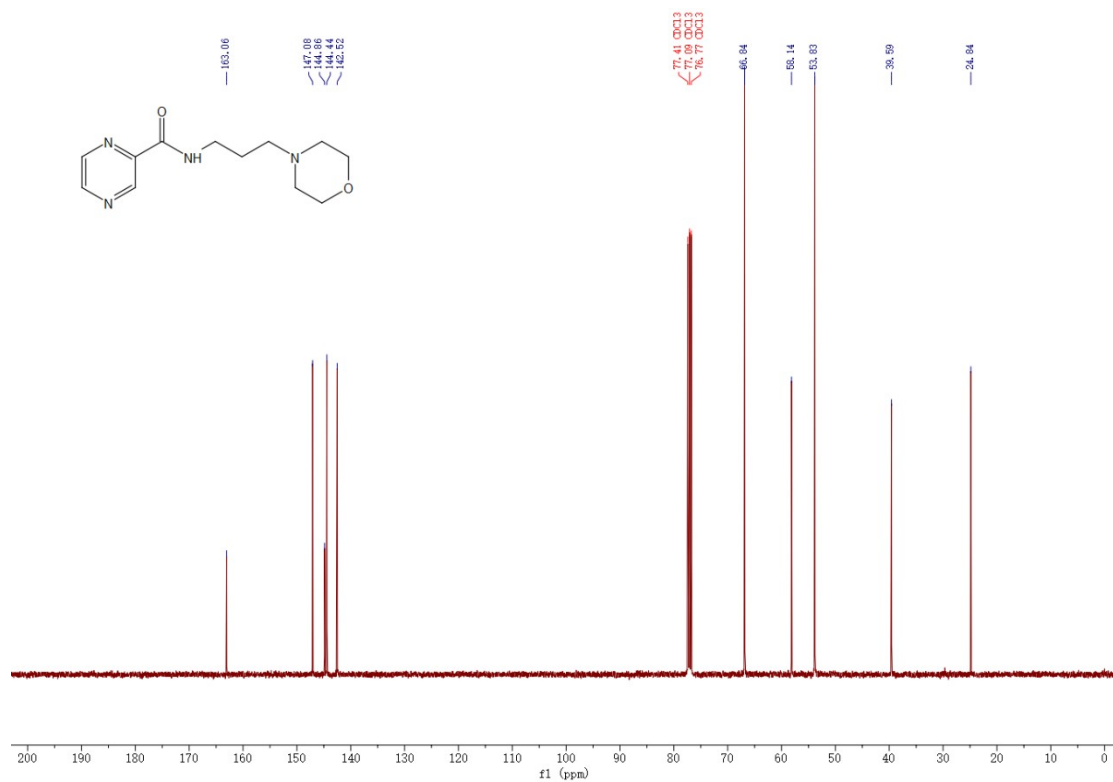

3u

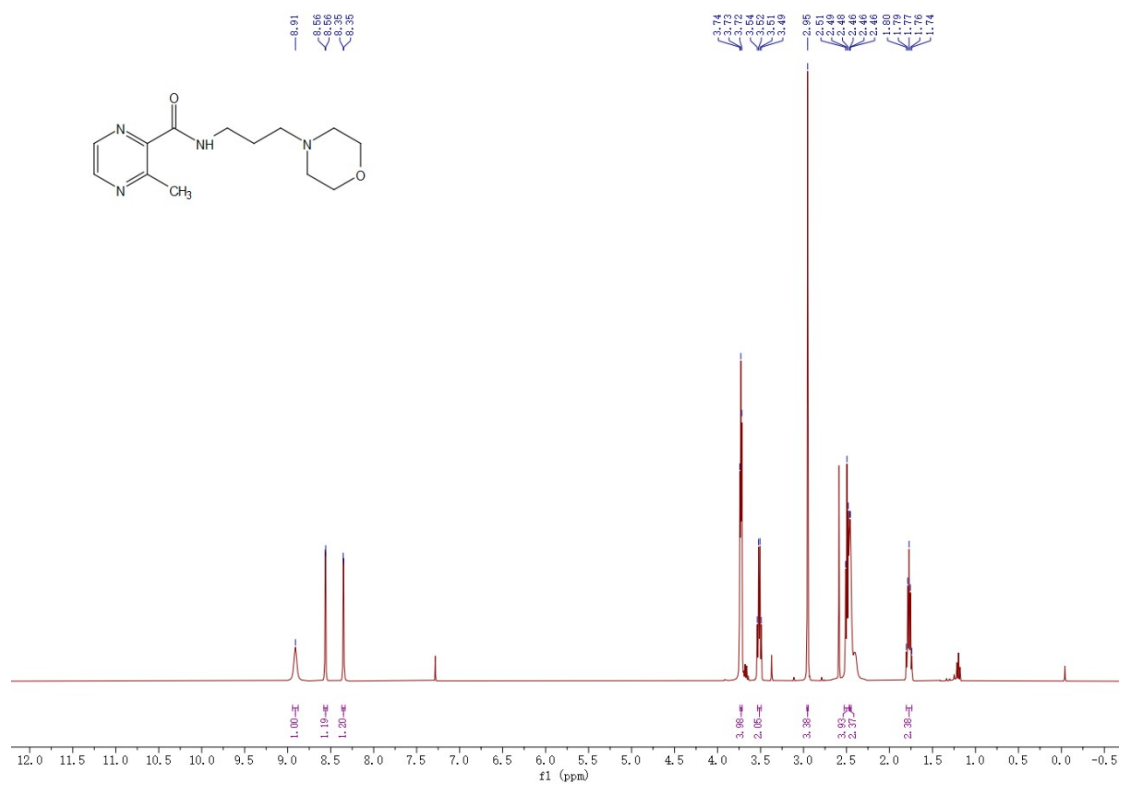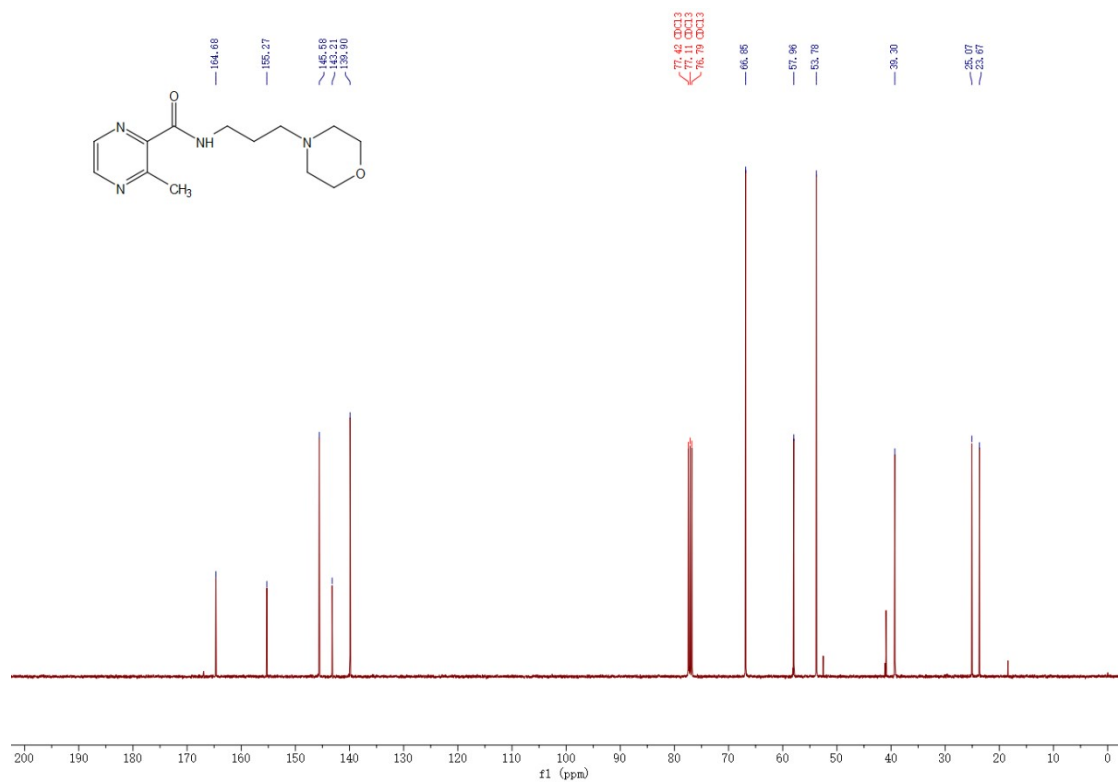

3v

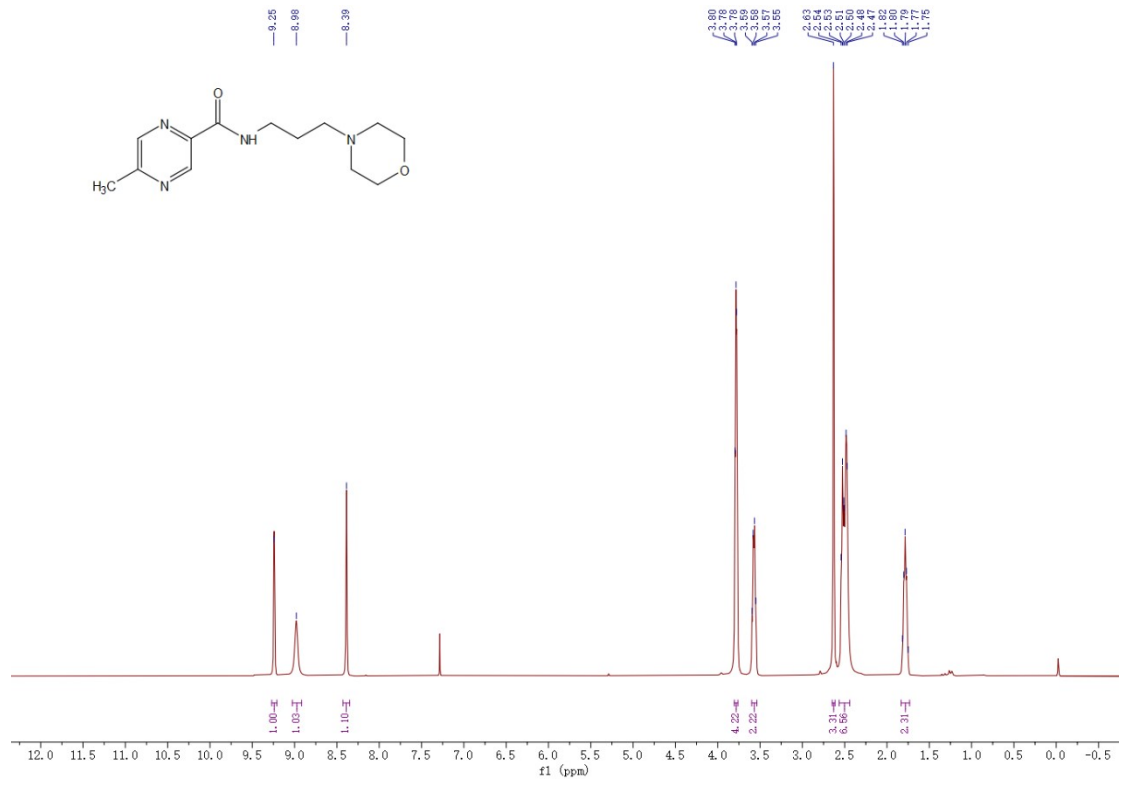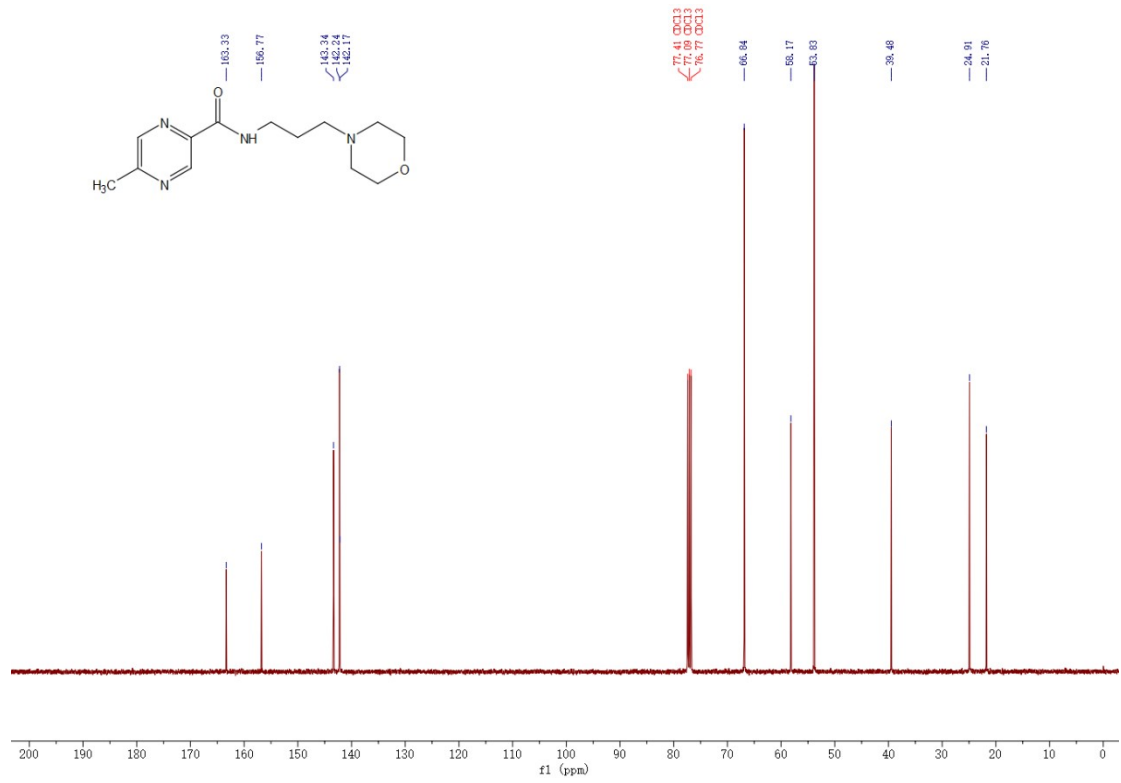

3w

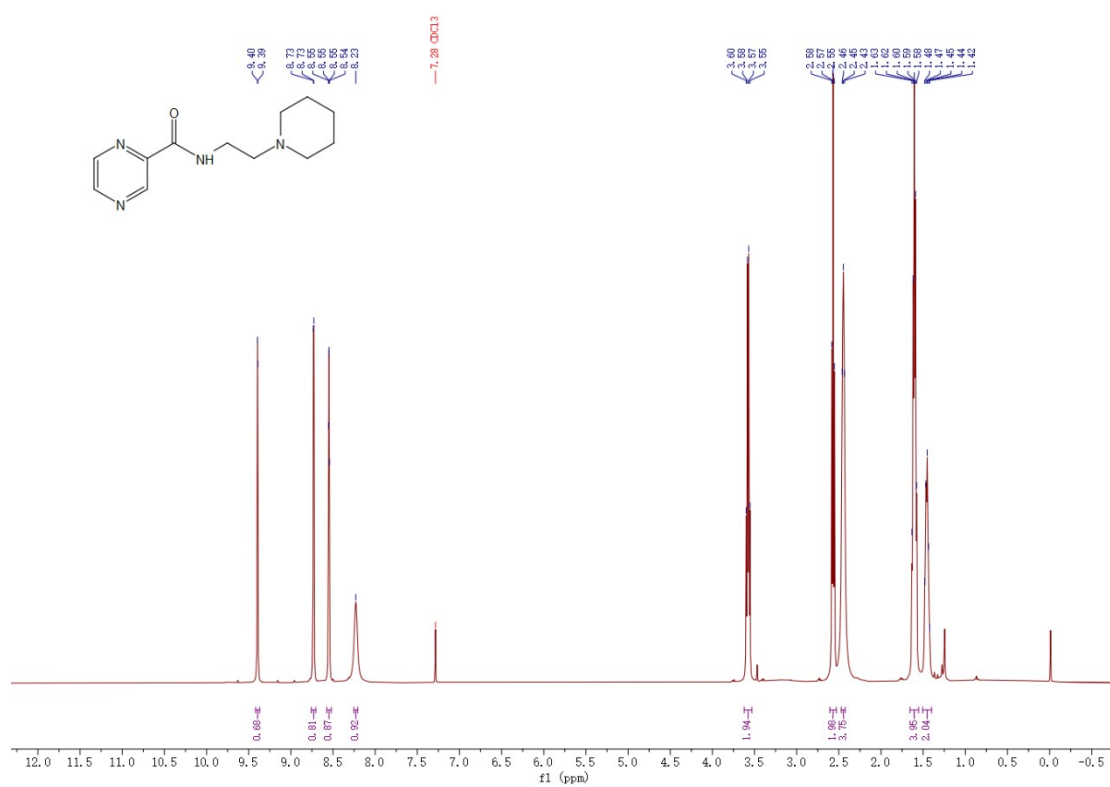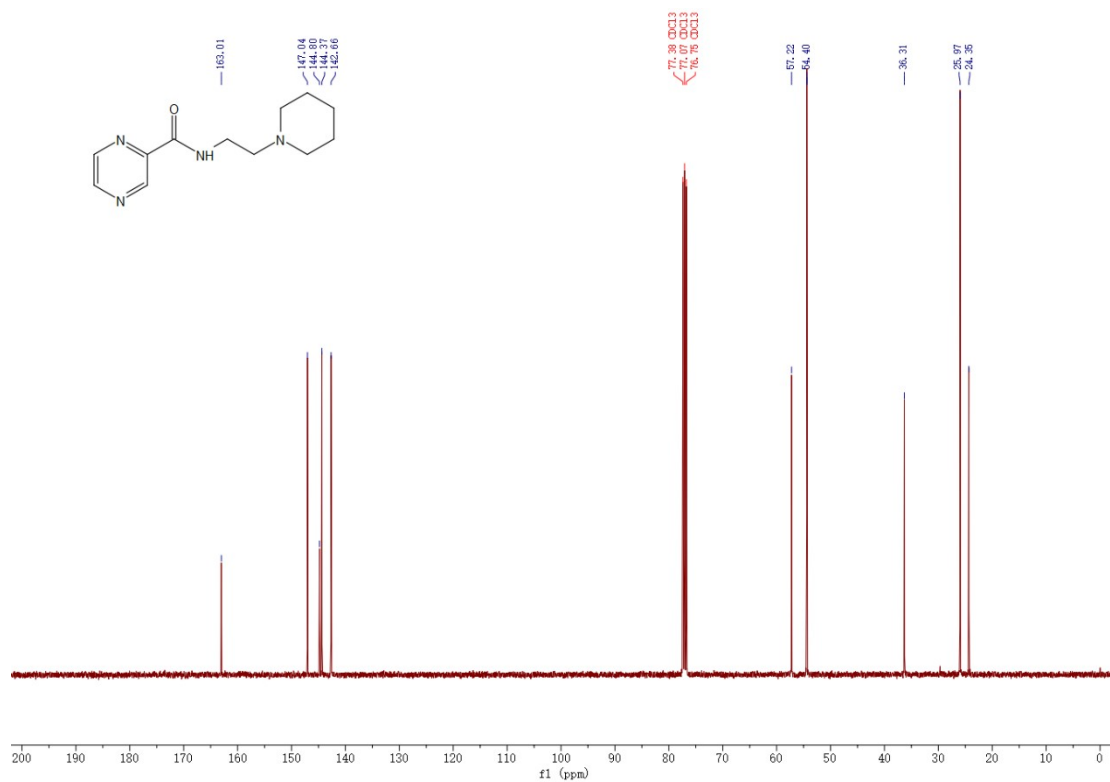



## Notes and references

1. J. Soika, C. McLaughlin, T. Neveselý, C. G. Daniliuc, J. J. Molloy and R. Gilmour, *ACS catalysis*, 2022, **12**, 10047-10056.
2. J. Šturala, S. Boháčová, J. Chudoba, R. Metelková and R. Cibulka, *The Journal of organic chemistry*, 2015, **80**, 2676-2699.
3. E. Zukic, D. Mokos, M. Weber, N. Stix, K. Ditrich, V. Ferrario, H. Müller, C. Willrodt, K. Gruber, B. Daniel and W. Kroutil, *ACS catalysis*, 2024, **14**, 8913-8921.
4. F. A. Wati, P. U. Adyarini, S. Fatmawati and M. Santoso, *Medicinal Chemistry Research*, 2020, **29**, 2157-2163.
